# A full cycle anti-viral drug screen identifies a clinical compound against adenovirus infection

Fanny Georgi<sup>1</sup>, Fabien Kuttler<sup>2</sup>, Luca Murer<sup>1</sup>, Vardan Andriasyan<sup>1</sup>, Robert Witte<sup>1</sup>, Artur Yakimovich<sup>3,4</sup>, Gerardo Turcatti<sup>2</sup>, Urs F Greber<sup>1</sup>

<sup>1</sup> Department of Molecular Life Sciences, University of Zurich (UZH), Winterthurerstrasse 190, 8057 Zurich, Switzerland

<sup>2</sup> Biomolecular Screening Facility, School of Life Sciences, Ecole Polytechnique Fédérale (EPFL) de Lausanne, Station 15, Lausanne 1015, Switzerland

<sup>3</sup> MRC Laboratory for Molecular Cell Biology, University College London, Gower St, London, WC1E 6BT, United Kingdom

<sup>4</sup> Artificial Intelligence for Life Sciences CIC, 40 Gowers walk, London, E1 8BH, United Kingdom

Corresponding author: Urs F Greber, [urs.greber@imls.uzh.ch](mailto:urs.greber@imls.uzh.ch)

**Human adenoviruses (HAdVs) are fatal to immune-suppressed people, but no effective anti-HAdV therapy is available. Here, we present a novel image-based high-throughput screening (HTS) platform, which scores the full viral replication cycle from virus entry to dissemination of progeny. We analysed 1,280 small molecular compounds of the Prestwick Chemical Library (PCL) for interference with HAdV-C2 infection in a quadruplicate blinded format, followed by robust image analyses, and hit identification. We present the entire set of image-based screening data including all the images, and the image analysis and data processing pipelines, as deposited at the Image Data repository (IDR) <sup>1</sup>, accession number [idr0081](#). We identified Nelfinavir mesylate as an inhibitor of HAdV plaque formation, in agreement with the previous notion that Nelfinavir is ineffective in single round HAdV infection assays. Nelfinavir has been FDA-approved for anti-retroviral therapy in humans. Our results underscore the power of image-based multi-round infection assays in identifying viral inhibitors with clinical potential.**

## **Background & Summary:**

Human adenoviruses (HAdV) predominantly cause diseases of the respiratory and gastrointestinal tracts. They are a significant cause of acute human disease with morbidity and mortality, especially for immuno-compromised patients <sup>2,3</sup> as indicated by a recent outbreak in the USA killing 12 children. Surprisingly, a recent case of HAdV-C2 caused meningoencephalitis was also reported in a middle-aged woman in the US <sup>4</sup>. HAdV have a high prevalence <sup>5-8</sup> and are broadly used as gene therapy vectors <sup>9</sup> and oncolytic viruses <sup>10,11</sup>. The high seroprevalence of HAdV-C2/5 <sup>12</sup> underlines that HAdV infections are asymptomatic in healthy individuals, but HAdV persist in mucosal lymphocytes, and thereby pose a severe risk for immunosuppressed patients undergoing stem cell transplantation <sup>13</sup>.

More than 100 HAdV genotypes have been formally approved <sup>14</sup> and are grouped into seven species based on hemagglutination assay and genome sequences <sup>15</sup>. They exhibit a broad range of tissue tropism, including the respiratory and gastrointestinal tracts, the eye, the kidney, the urogenital tracts and blood cells. While species A, F and G target the gastrointestinal tract, HAdV-B, C and E cause infections of the respiratory tract, and conjunctivitis is mostly associated with species B and D, but also C types. HAdV-B show the broadest spectrum of tropisms, also infecting the kidney and hematopoietic system <sup>7,13</sup>.

49 HAdV is a non-enveloped virus with a double-stranded DNA genome of ~36 kbp tightly packaged  
50 into an icosahedral capsid of about 90 nm in diameter<sup>16,17</sup>. The best-studied HAdV are HAdV-  
51 C2/5 (species C, type 2 and 5), which are very closely related to each other. HAdV enter cells by  
52 receptor mediated endocytosis, penetrate the endosomal membrane by the activation of a viral  
53 lytic machinery, and shed virion proteins in a stepwise manner, until they arrive at the nuclear  
54 membrane, where they uncoat and release their genome to the nucleus<sup>18,19</sup>. In the nucleus the  
55 viral genome gives rise to the immediate early viral mRNA encoding the E1A protein which then  
56 transactivates all the subviral promoters and is key to give rise to lytic infection and maintains viral  
57 persistence in presence of the innate immune regulator interferon<sup>20</sup>. Mature HAdV progeny is  
58 known to be released by cell lysis upon rupture of the nuclear envelope and the plasma  
59 membrane, giving rise to cell-free virions<sup>21–23</sup>.

60  
61 To this day, no effective anti-viral therapy is available against HAdV infection. For example, the  
62 nucleoside analogue Cidofovir is the current standard of care for the treatment of HAdV infections,  
63 albeit with poor clinical efficacy<sup>7</sup>. Cidofovir is a general inhibitor of viral DNA polymerases and  
64 impairs the replication of viral DNA<sup>24</sup>. The pre-clinical development of novel anti-HAdV agents  
65 has been limited by the shortage of a suitable small animal model, although Syrian Hamsters  
66 support HAdV-C progeny production, albeit in limited amounts<sup>25</sup>.

67  
68 Here, we developed a data-based approach to identify novel inhibitors of HAdV infection by  
69 testing the Prestwick Chemical Library (PCL) to inhibit HAdV-C2 infection in cell cultures. The  
70 PCL is commercially available, and comprises a library of 1,280 off-patent FDA-approved small  
71 molecules (listed in Supplementary Table 1) covering significant pharmaceutical range. PCL has  
72 been successfully used to identify many compounds for repurposing applications ranging from  
73 antimicrobial agents<sup>26</sup> to anticancer candidates<sup>27</sup>. For a full list of publications, see<sup>28</sup>. We  
74 performed a phenotypic screen for HAdV-C2 infection, as outlined in (Figure 1A, 1B). We took  
75 advantage of automated fluorescence microscopy and image-based scoring of the progression  
76 of multi-round infections using Plaques2.0 software<sup>29</sup>. This high-throughput screening (HTS)  
77 modality was carried out at a 384-well plate format. For representative images, see Figure 1C.

78  
79 We demonstrate robust imaging methodology, image analysis and data processing routines as  
80 concluded from parallel procedures in two teams at independent institutions, the Biomolecular  
81 Screening Facility at Ecole Polytechnique Fédérale de Lausanne (EPFL) and the Department of  
82 Molecular Life Sciences at University of Zurich (UZH). To score the infection phenotypes, we used  
83 five infection assay features obtained from microscopy: the number of nuclei, the number of  
84 infected nuclei, the infection index as calculated from the total nuclei and the infected cells, the  
85 number of plaques (areas of multi-round infection foci originating from a single infected host cell)  
86 and the integrated viral infection marker, in this case the green fluorescence protein (GFP)  
87 intensity. All data is available at the Image Data repository (IDR)<sup>1</sup> (IDR accession number  
88 idr0081). The structure of the repository is outlined in Figure 2. Raw and scored infection  
89 phenotype features are shown for UZH and EPFL analyses (Supplementary Tables 2 and 3, and  
90 Supplementary Tables 4 and 5, respectively). Rigorous assay development ensured a high assay  
91 quality as indicated in Figure 3 and by mean Z'-factors of 0.52 for the number of plaques (Table  
92 1). The screening was performed in four biological replicates at high reproducibility, see Figure 4  
93 and Table 2. We further excluded those PCL compounds that showed significant toxicity in the

94 absence of infection (Table 3 and Figure 5). Imaging, image analysis and scoring by the two  
95 independent teams yielded well correlated scores, as depicted in Figure 6.

96  
97 Our data indicate a high significance of the identified top hit, Nelfinavir mesylate (Figure 1D and  
98 6). We confirmed the efficacy of Nelfinavir as an inhibitor of HAdV infection by biological follow-  
99 up studies (submission in preparation).

100

## 101 **Methods:**

102

### 103 **Virus**

104 HAdV-C2-dE3B virus was produced as described <sup>21</sup>. In brief, the virus was generated by  
105 exchange of the viral E3B genome region with a reporter cassette harbouring the enhanced green  
106 fluorescent protein (GFP) under the immediate early Cytomegalovirus (CMV) promoter. The virus  
107 was grown in A549 cells and purified by double caesium chloride gradient centrifugation <sup>30</sup>.  
108 Aliquots supplemented with 10% glycerol (v/v) were stored at -80°C. HAdV-C2-dE3B was found  
109 to be homogeneous by SDS-PAGE and negative-stain analyses by transmission electron  
110 microscopy.

111

### 112 **Cell line**

113 A549 (human adenocarcinomic alveolar basal epithelium) cells were obtained from the American  
114 Type Culture Collection (ATCC), Manassas, USA. The cells were maintained in full medium: high  
115 glucose Dulbecco Modified Eagle Medium (DMEM; Thermo Fisher Scientific, Waltham, USA)  
116 containing 7.5% fetal bovine serum (FBS, Invitrogen, Carlsbad, USA), 1% L-glutamine (Sigma-  
117 Aldrich, St. Louis, USA) and 1% penicillin streptomycin (Sigma-Aldrich, St. Louis, USA) and  
118 subcultured following PBS washing and trypsinisation (Trypsin-EDTA, Sigma-Aldrich, St. Louis,  
119 USA) weekly. Cell cultures were grown at standard conditions (37°C, 5% CO<sub>2</sub>, 95% humidity) and  
120 passage number limited to 20.

121

### 122 **Preparation of pre plates**

123 10 µl 0.0125% DMSO in PBS was spotted on all 384 wells each of imaging-compatible 384-well  
124 plates (Matrix plates #4332, Thermo Fisher Scientific, Waltham, USA) using a Matrix WellMate  
125 dispenser and normal bore Matrix WellMate tubing cartridges (Thermo Fisher Scientific, Waltham,  
126 USA). Plates were sealed and stored at -20°C.

127

### 128 **Blinding**

129 The PCL compound arrangement as spotted by EPFL across the 4 plates A - D comprising each  
130 screening set replicate 1 - 4 was blinded and replaced by UZH with internal identifier  
131 (Supplementary Tables 2 and 3, *compoundIdentifier* 1 to 1280). The identity of the compounds  
132 was only disclosed (Table 3 and Supplementary Tables 1 and 2, *PCL\_ID* Prestw-1 to Prestw-  
133 1804 and *compoundName*) after the screening process including hit filtering was finished.

134

### 135 **Compounds**

136 The PCL was obtained from Prestwick Chemical (Illkirch, France). 3'-Deoxy-3'-fluorothymidine  
137 (DFT, CAS number 25526-93-6) was obtained from Toronto Research Chemical, North York,

138 Canada. All compounds were dissolved in Dimethyl sulfoxide (DMSO, Sigma-Aldrich, St. Louis,  
139 USA) at a final stock concentration of 10 mM and stored at -20°C.

140

### 141 **Presto-blue toxicity assay**

142 Toxicity of the PCL chemical compounds on A549 in absence of infection was tested using  
143 compound concentrations, treatment timing and seeding cell numbers corresponding to the  
144 screening protocol, and using the Presto Blue Cell Viability reagent (Thermo Fisher Scientific,  
145 Waltham, USA). Briefly, following 3.5-day continuous treatment of A549 cells, 10% final  
146 PrestoBlue was added to each well and incubated for 1 h at standard cell incubation conditions.  
147 Fluorescence intensity (bottom-read) was then measured using a multi-well plate reader (Tecan  
148 Infinite F500, Tecan, Männedorf, Switzerland) with excitation at 560/10 nm, emission at 590/10  
149 nm at a fixed gain. Doxorubicin hydrochloride (Prestw-438, Prestwick Chemical, Illkirch, France)  
150 was used as a positive control for cytotoxicity, at a final concentration of 10  $\mu$ M, and the  
151 corresponding volume of DMSO was used as a negative control. The full PCL library was tested  
152 on duplicated plates. The EPFL-BSF in-house Laboratory Information Management System  
153 (LIMS) was used for data processing and statistical validation. First, raw PrestoBlue readings  
154 were normalized per plate to negative control values at 0 and positive controls at 1. Then, the  
155 normalized values of the duplicates were averaged. Assay quality was assessed for each plate  
156 through the Z'-factor calculation. Compounds were considered toxic hits when the normalized  
157 value for all replicates was higher than the average + 3 $\sigma$  (standard deviation, SD) of the DMSO  
158 negative control for the corresponding plate. Scores and score SD were then calculated for hit  
159 compounds by averaging normalized value for all replicates.

160

### 161 **Preparation of Z' and screening plates**

162 10 nl of 10 mM PCL compounds, the nucleoside analogue DFT positive control (all dissolved in  
163 DMSO) and DMSO only as negative control were pre-spotted on imaging-compatible 384-well  
164 plates (Falcon plates, Corning Inc., New York, USA) using an Echo acoustic liquid handling  
165 system (Labcyte, San Jose, USA) by the EPFL-BSF, sealed and stored at -20°C. Z' plates  
166 consisted of 192 technical replicates of positive and negative control, each, per 384-well plate.  
167 Each screening plate set consisted of 4 plates A to D. Each screening plate consisted of 32  
168 technical replicates of positive and negative control, each, and 320 single technical replicate PCL  
169 compounds.

170

### 171 **Wet-lab screening pipeline**

172 The screening was performed in four independent biological replicates. Wet-lab liquid handling  
173 was performed using a Matrix WellMate dispenser and Matrix WellMate tubing cartridges (Thermo  
174 Fisher Scientific, Waltham, USA). Prior to usage, tubings were rinsed with 125 ml autoclaved  
175 ddH<sub>2</sub>O followed by 125 ml autoclaved PBS. Pre-spotted compound plates were thawed at room  
176 temperature (RT) for 30 min, briefly centrifuged before compounds were dissolved in 10  $\mu$ l/ well  
177 PBS. 4,000 A549 cells/ well in 60  $\mu$ l full medium were seeded onto the compounds using standard  
178 bore tubing cartridges. Following cell adhesion over night, the cells are inoculated with  $1.77 \times 10^5$   
179 genome equivalents per well of HAdV-C2-dE3B in 10  $\mu$ l full media using bovine serum albumin  
180 (BSA, cell-culture grade, Sigma-Aldrich, St. Louis, USA)-blocked small bore tubing cartridges.  
181 Final compound concentration was 1.25  $\mu$ M at 0.0125% DMSO. Infection was allowed to progress  
182 over multiple infection rounds for 72 h giving rise to foci of infected cells originating from a single

183 first round infected cell termed plaque. Cells were fixed for 1 h at RT by addition of 26.6  $\mu$ L 16%  
184 PFA and 4  $\mu$ g/ml Hoechst 33342 (Sigma-Aldrich, St. Louis, USA) in PBS using standard bore  
185 tubing cartridges. Cells were washed 3 times with PBS before PBS supplemented with 0.02%  $N_3$   
186 was added and plates were sealed for long-term storage at 4°C. Following usage, tubings were  
187 rinse with 125 ml autoclaved ddH<sub>2</sub>O followed by 125 ml autoclaved PBS and autoclaved for re-  
188 usage.

189

## 190 **Imaging**

191 Nuclei (DAPI channel) and viral GFP (FITC channel) were imaged on two devices. At UZH, plates  
192 were imaged on an IXM-C automated high-throughput fluorescence microscope (Molecular  
193 Devices, San Jose, USA) using MetaXpress (version 6.2, Molecular Devices, San Jose, USA)  
194 and a 4x air objective (Nikon S Fluor, 0.20 NA, 15.5 mm WD, Nikon Instruments, Minato, Japan)  
195 at widefield mode. Image size 2,048<sup>2</sup> px at 1.72  $\mu$ m/px resolution acquired on an Andor sCMOS  
196 camera (Oxford Instruments, Abingdon, UK). Exposure times: DAPI 150 ms, FITC 20 ms. At  
197 EPFL, images were acquired on a IN Cell 2200 automated high-throughput fluorescence  
198 microscope (GE Healthcare, Chicago, USA) using IN Cell Analyzer (version 6.2, GE Healthcare,  
199 Chicago, USA) and a 4x air objective (Nikon Plan Apo, 0.20 NA, 15.7 mm WD, Nikon Instruments,  
200 Minato, Japan) at widefield mode. Image size 2,048<sup>2</sup> px at 1.625  $\mu$ m/px resolution acquired on an  
201 Andor sCMOS camera. Exposure times: DAPI 300 ms, FITC 40 ms.

202

## 203 **Image analysis**

204 The infection phenotype for each well was quantified by Plaque2.0<sup>29</sup>  
205 (<https://github.com/plaque2/matlab/tree/antivir>) via five read-outs: number of nuclei, number of  
206 infected nuclei, the ratio between infected and total nuclei referred to as infection index, number  
207 of multi-round infection foci termed plaques (plaque forming units, pfu) and the integrated viral  
208 transgenic GFP intensity. Plaque2.0 parameters were optimized independently at UZH and EPFL  
209 for the data acquired at the respective institution.

210

## 211 **Z'-factor calculation**

212 The Z'-factor was computed using R version 3.3.2<sup>31</sup> according to Equation (1)

$$213 \quad Z' = 1 - \frac{(3\sigma_+ + 3\sigma_-)}{|\mu_+ - \mu_-|} \quad (1)$$

214 where  $\sigma_+$  is the SD of the positive control,  $\sigma_-$  is the SD of the negative control,  $\mu_+$  the mean of the  
215 positive control and  $\mu_-$  the mean of the negative control.

216

## 217 **Screening data processing**

218 Plaque2.0 results were further independently processed and filtered. At UZH, results were  
219 processed in R version 3.3.2<sup>31</sup>, EPFL used KNIME version 3.4.0<sup>32</sup> as well as the EPFL-BSF in-  
220 house LIMS. Mean infection scores over the Plaque2.0 read-outs of the four biological replicates  
221 of each PCL compound and the 16 biological replicates containing each 16 technical replicates  
222 of positive and negative control, each, were calculated. Each compound's scores were normalized  
223 by the mean score of the DMSO negative control of the respective plate. Only non-toxic, effective  
224 PCL compounds were considered as HAdV inhibitor candidates. Non-toxic compounds were  
225 filtered by applying an inclusive  $\mu_+$  (mean of the negative control)  $\pm 2\sigma$  (SD of the negative control)  
226 threshold for number of nuclei. Efficacy was filtered by applying an excluding  $\mu_+ \pm 3\sigma$  threshold



227 for the infection scores (number of infected nuclei, infection index, number of plaques or  
228 integrated GFP intensity).

229

### 230 **Data Records:**

231

#### 232 **Data structure and repository**

233 The HAdV screening data comprise the information collected during assay development,  
234 including stability, quality and the PCL screening itself. The latter two have been imaged on two  
235 different microscopes. We provide the parameters used for Plaque2.0 image analysis, and the  
236 code for the subsequent hit filtering in R. The data structure as available at the IDR <sup>1</sup>, accession  
237 number idr0081, is outlined in Figure 2.

238

#### 239 **Data sets and file types**

240 The provided data consists of four data sets 1 to 4.

241 - *1-prePlates* contains layouts (.csv), images (.tif), Plaque2.0 image analysis parameters (.mat)  
242 and results (.csv) for the assay stability test plates performed at UZH prior to Z' plates (*preZ*) and  
243 the AntiVir screen (*preScreen*).

244 - *2-ZPlates* contains layouts (.csv), images (.tif), Plaque2.0 image analysis parameters (.mat) and  
245 results (.csv) for the two Z' plates a and b as imaged and analysed at (*Data\_UZH*) and EPFL  
246 (*Data\_EPFL*).

247 - *3-Screen* contains layouts (.csv), images (.tif), Plaque2.0 image analysis parameters (.mat) and  
248 results (.csv) for the 16 screening plates (4 biological replicas 1 - 4 each consisting of a set of 4  
249 plates A - D) as imaged and analysed at UZH (*Data\_UZH*) and EPFL (*Data\_EPFL*). Moreover,  
250 *Analysis* contains the Plaque2.0 batch processing (*AntiVir\_batchprocessing.m*) and hit filtering  
251 pipeline (*AntiVir\_hitfiltering.R*) used by UZH.

252 - *4-Toxicity* contains the Presto-blue raw results (.csv) for toxicity in absence of infection.

253

### 254 **Technical Validation:**

255

#### 256 **Assay stability**

257 The wet-lab screening pipeline was optimized regarding liquid handling, cell seeding, virus  
258 inoculum, positive and negative control, time line, imaging and image analysis to ensure high  
259 assay stability and reproducibility. Furthermore, all compounds, especially media and  
260 supplements, the BSA for tubing saturation, PFA- and Hoechst-supplemented fixative were  
261 prepared as large batch from a single LOT and stored as single-use aliquots. Assay stability with  
262 respect to cell and infection phenotype was tested following the established wet-lab, imaging and  
263 image analysis pipeline prior to every experiment on pre plates. Since the solvent control had  
264 already been spotted in 10 µl PBS, no further PBS was added prior to cell seeding. If infection  
265 scores were found to be low due to limited stability of viral stocks, the virus stock dilution in the  
266 subsequent experiment was decreased.

267

#### 268 **Independent analysis**

269 Imaging, image analysis and screening data processing was performed by two independent  
270 research teams from two independent institutions at UZH and EPFL. Both dry-lab pipelines  
271 confirmed the high assay quality (Table 1). As summarized in Figure 6 left panel, both scores are

272 strongly correlated with  $R^2$  between 0.6870 - 0.9870. Both approaches yielded identical top scored  
273 compounds (Figure 6 right panel), of which Prestw-1764, Nelfinavir mesylate, was the top hit.

274

#### 275 **Assay quality determination: Z'-factor**

276 The assay's effect size was assessed following the established wet-lab, imaging and image  
277 analysis pipeline for two independently performed Z' plates (Table 1 and Figure 2).  $3\sigma$  Z'-factors  
278 of *numberOfInfectedNuclei*, *infectionIndex* and *numberOfPlaques* were in the range of 0.30 to  
279 0.57 and thus good to excellent. *totalVirusIntensity* (Z'-factors between -0.07 to 0.08) are not  
280 suitable to identify HAdV infection inhibitors, while *numberOfNuclei* (Z'-factors between -1.11 to  
281 -8.10) is not relevant either. Additionally, the Z'-factors were determined for each of the 16  
282 screening plates (Table 2 and Figure 3).  $3\sigma$  Z'-factors of *numberOfInfectedNuclei*, *infectionIndex*  
283 and *numberOfPlaques* were again good to excellent (0.27 to 0.57).

284

#### 285 **Usage Notes:**

286

#### 287 **Infection scoring using the Plaque2.0 GUI**

288 A detailed manual for Plaque2.0-based infection phenotype scoring is available at  
289 <http://plaque2.github.io/>. No MATLAB license is necessary.

290

291 Five parameters were quantified for each well: the number of nuclei (*numberOfNuclei*), number  
292 of infected nuclei (*numberOfInfectedNuclei*), the ratio between number of infected and total nuclei  
293 (*infectionIndex*), the number of multi-round infection foci termed plaques (*numberOfPlaques*) and  
294 the extend of viral GFP reporter expression as integrated GFP intensity (*totalVirusIntensity*).

295

296 To analyse the HAdV screening data by Plaque2.0, the following setting should be used:

#### 297 **Input/Output:**

298 **Processing Folder:** Path to folder containing the images (e.g. *ScreenA /3-*

299 *Screen/Data\_EPFL/Screen/BSF018292\_1A*).

300 **filename pattern Data\_UZH:** `.* (?<wellName>[A-Z][0-9]*)_(?<channelName>w[0-9]*).TIF`

301 **filename pattern Data\_EPFL:** `.* (?<wellName>[A-Z] - [0-9]+)([/fld 1 vv (?<channel>[A-Z]{4})].*.tif`

302 **Plate name:** Name of the plate to be analysed (e.g. *BSF018292\_1A*)

303 **Result Output Folder:** Path to the results folder in the respective Data folder (e.g. *ScreenA/3-*

304 *Screen/Data\_EPFL/Results*).

305 **Stitch:** Stitching of the images is not necessary, since every 384-well is imaged in a single site.

306 Do not activate the tab.

#### 307 **Mask:**

308 **Custom Mask File:** Path to the manually defined mask file (e.g. *ScreenA/3-*

309 *Screen/Data\_UZH/Parameters*).

#### 310 **Monolayer:**

311 **Channel:** Nuclei were imaged in channel 1.

#### 312 **Plaque:**

313 **Channel:** Viral GFP reporter signal was imaged in channel 2.

314

#### 315 **Code Availability:**

316

317 **Plaque2.0 batch image analysis for infection scoring**

318 The MATLAB (version R2016b, The MathWorks, Natick, USA) script *AntiVir\_batchprocessing.m*  
319 used by UZH for image analysis is provided at IDR, accession number idr0081, under *ScreenA/3-*  
320 *Screen/Analysis*. It is based on the Plaque2.0 software available on GitHub under GPLv3 open  
321 source license: <https://github.com/plaque2/matlab>.

322 To batch analyse the HAdV screening data by Plaque2.0, fork or download the Plaque2.0 AntiVir  
323 code from GitHub: <https://github.com/plaque2/matlab/tree/antivir>. Place the  
324 *AntiVir\_batchprocessing.m* file from *ScreenA/3-Screen/Analysis* into the *Plaque2/matlab* folder  
325 and follow the instructions in *AntiVir\_batchprocessing.m*. A MATLAB license is required.

326

327 **Hit filtering using R**

328 The R<sup>31</sup> (version 3.6.1 (2019-07-05)) script *AntiVir\_hitfiltering* used by UZH for data processing  
329 and hit filtering is provided at IDR accession number idr0081 under *ScreenA/3-Screen/Analysis*.



## 330 **Acknowledgements, Author Contributions & Competing Interests**

331

### 332 **Author Contributions:**

333 UFG, VA, AY conceived the screening idea. FG designed the experiments, and with UFG  
334 coordinated the project. FK prepared the PCL-spotted plates. FG and RW performed the  
335 experiments. FG and FK acquired the data. FG and VA analysed the imaging data. LM and FG  
336 processed the data. GT organized and supervised the screening project at the EPFL-BSF. FG,  
337 FK and UFG wrote manuscript, with input from all the co-authors.

338

### 339 **Acknowledgements:**

340 We thank the entire Greber lab for fruitful discussions and critical assessment of the data.

341

### 342 **Competing Interests:**

343 The authors declare no conflict of interest.

344

### 345 **Funding:**

346 The work was supported by the Swiss National Science Foundation to UFG (Grant numbers  
347 316030\_170799 / 1 and 31003A\_179256 / 1), and to GT (National Research Program “NCCR  
348 chemical biology”).

349

### 350 **Abbreviations:**

351 BSA, bovine serum albumin;  
352 BSF, Biomolecular Screening Facility;  
353 CMV, Cytomegalovirus;  
354 DFT, 3'-Deoxy-3'-fluorothymidine;  
355 DMEM, Dulbecco Modified Eagle medium;  
356 DMSO, Dimethyl sulfoxide;  
357 dpi, days post infection;  
358 EPFL, Ecole Polytechnique Fédérale de Lausanne;  
359 FBS, fetal bovine serum;  
360 GFP, green fluorescent protein;  
361 HAdV, Human adenovirus;  
362 hpi, hours post infection;  
363 HTS, high-throughput screening;  
364 IDR, The Image Data Resource;  
365 LIMS, Laboratory Information Management System;  
366 LUT, Look up table;  
367 PCL, Prestwick Chemical Library;  
368 PFA, para-formaldehyde;  
369 pfu, plaque forming units;  
370 RT, room temperature;  
371 SE, standard error;  
372 SD, standard deviation;  
373 UZH, University of Zurich

374 **Figures & Tables**  
A

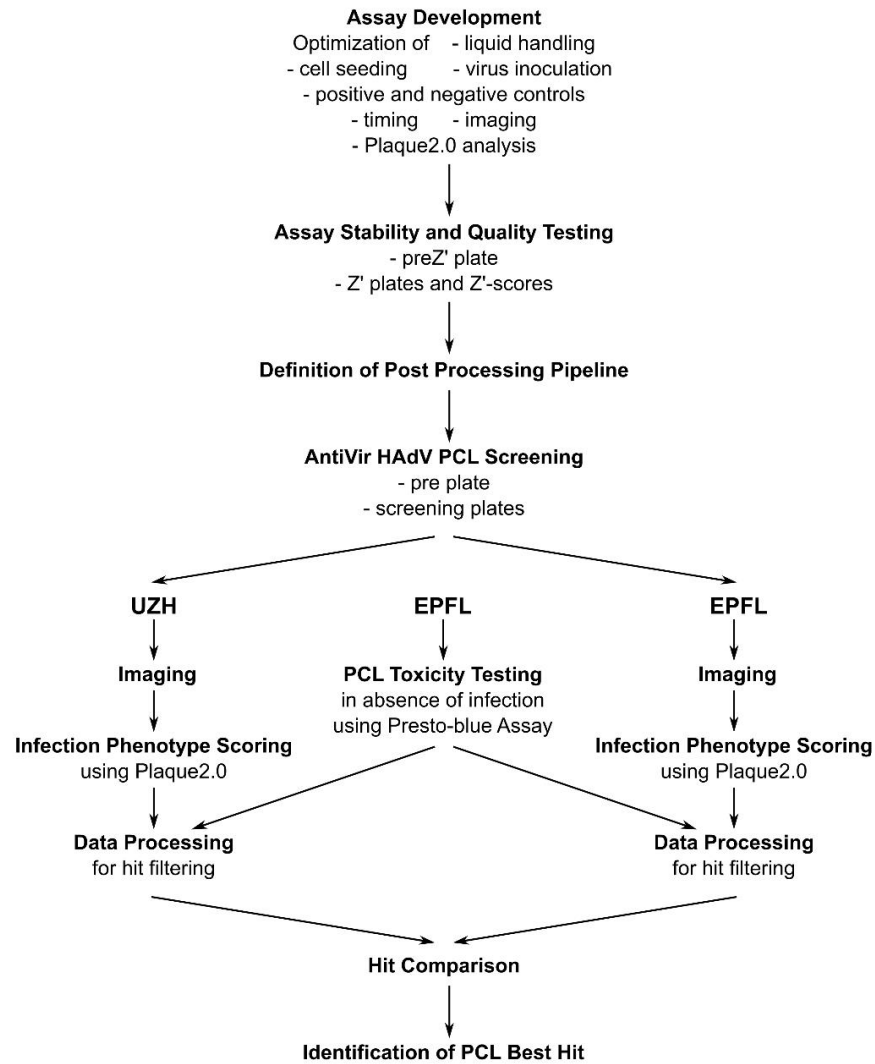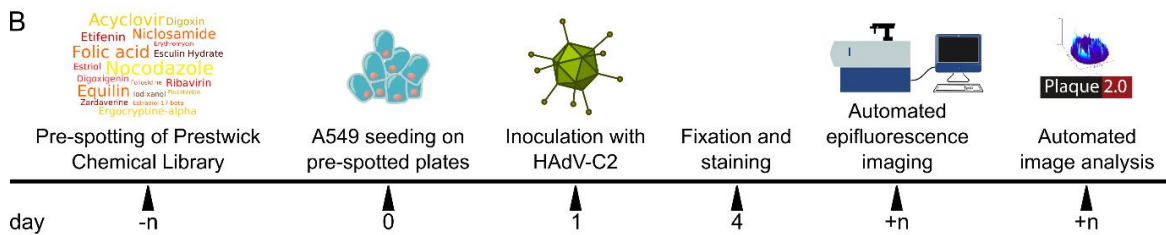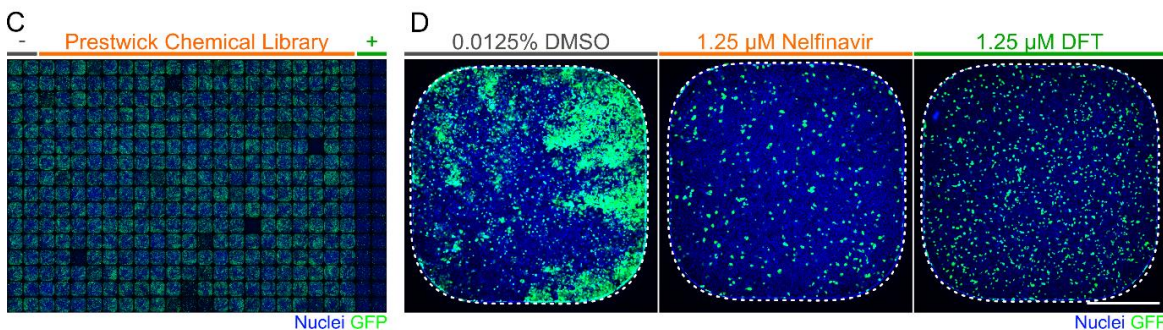

375

376 **Fig. 1: The HAdV screening procedure.** **A** Following assay development, stability and quality testing, the  
377 HAdV screening of the PCL is performed. Imaging, image analysis and data processing is performed  
378 independently at UZH and EPFL, before ranked hits are compared. **B** Schematic overview of the wet-lab  
379 pipeline. PCL compounds and DFT positive control in DMSO as well as DMSO alone as negative control  
380 are pre-spotted onto 384-well imaging plates by Echo acoustic liquid handling at 10 nl corresponding to a  
381 final concentration of 1.25  $\mu\text{M}$  in 80  $\mu\text{l}$  assay volume/ well and stored at  $-20^{\circ}\text{C}$ . Compound-blinded plates  
382 are thawed and 4,000 A549 cells/ wells seeded. The following day, the cells are inoculated with HAdV-C2-  
383 dE3B at  $1.77 \cdot 10^5$  genome equivalents / well. Allowing for multiple viral replication rounds, the cells are PFA-  
384 fixed at 72 hpi and the nuclei stained using Hoechst. The infection phenotype is imaged using an  
385 epifluorescence HT microscope and scored using Plaque2.0. The data of the four technical replicates is  
386 further processed in R or through EPFL-BSF LIMS. **C** Exemplary epifluorescence microscopy 384-well  
387 images stitched to a screening plate overview of consistent of 16 replicates of negative (two most left  
388 columns) and positive control (two most right columns) and 320 blinded PCL compounds (centre 20  
389 columns). Hoechst-stained nuclei are shown in blue, viral GFP in green. **D** Representative 384-well  
390 epifluorescence microscopy images of the DMSO negative control (most left), the DFT positive control  
391 (most right) and the top hit Nelfinavir mesylate (centre). Hoechst-stained nuclei are shown in blue, viral  
392 GFP in green. Scale bar is 5 mm.

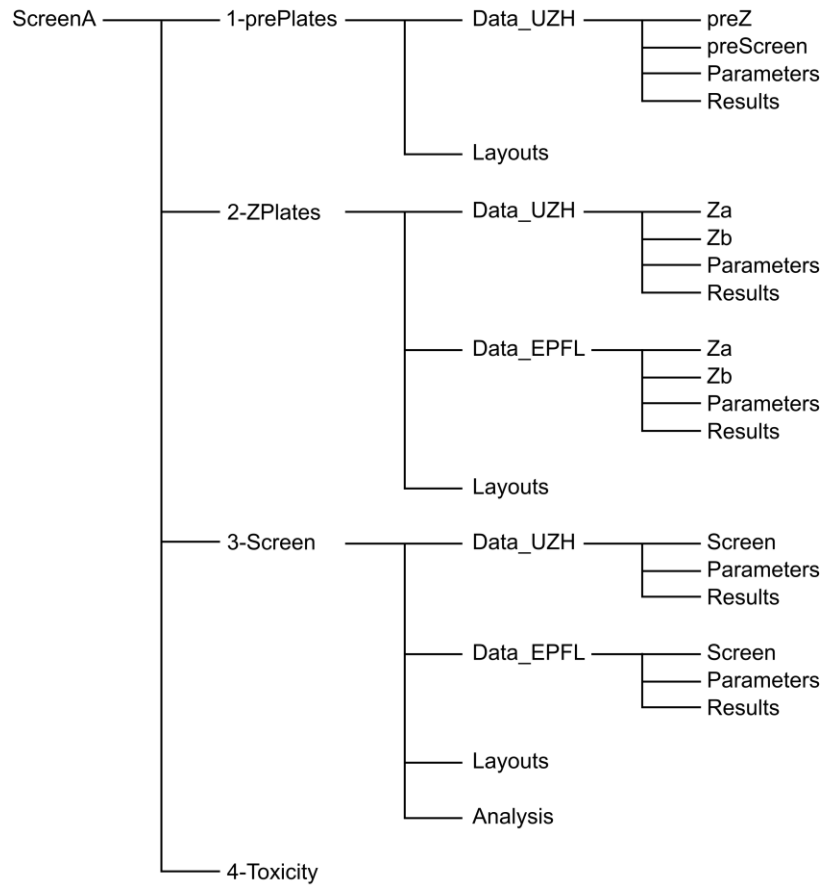

393  
394

**Fig. 2. HAdV data structure** as provided at IDR, accession number idr0081.

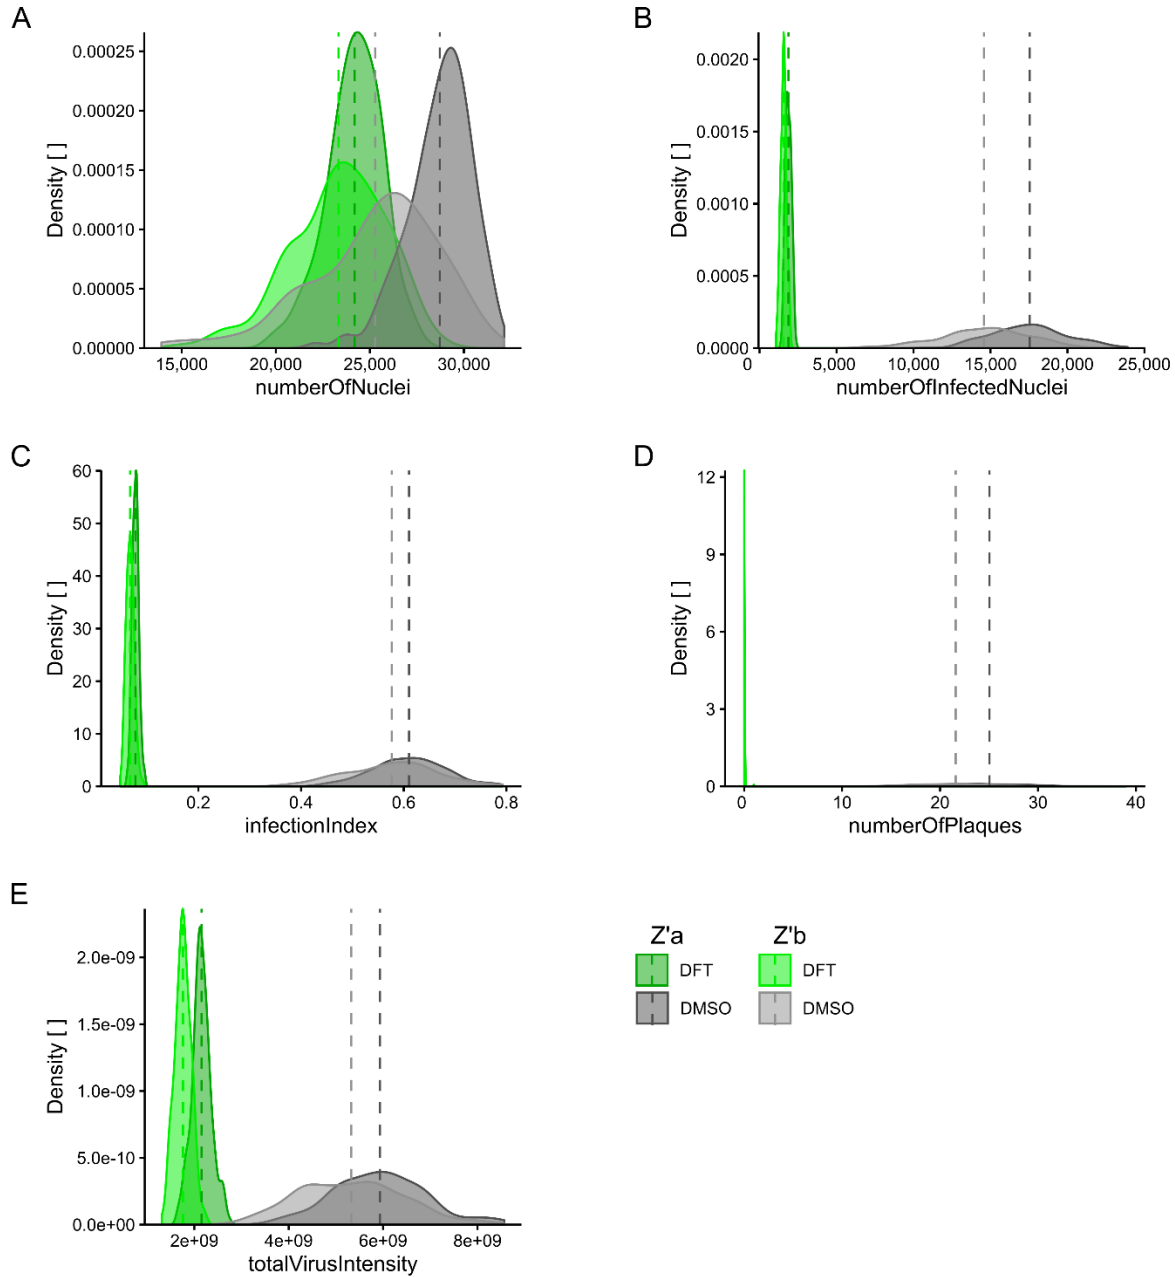

395  
 396 **Fig. 3: Infection score density of positive and negative controls across Z' plates.** Distribution of **A**  
 397 *numberOfNuclei*, **B** *numberOfInfectedNuclei*, **C** *infectionIndex*, **D** *numberOfPlaques* and **E**  
 398 *totalVirusIntensity* in negative control (0.0125% DMSO) compared to positive control-treated (1.25  $\mu$ M DFT)  
 399 samples of the two Z' plates. Dark green and dark grey indicates Z' plate a, light green and grey show Z'  
 400 plate b. Dashed vertical lines mark mean of 192 technical replicas.



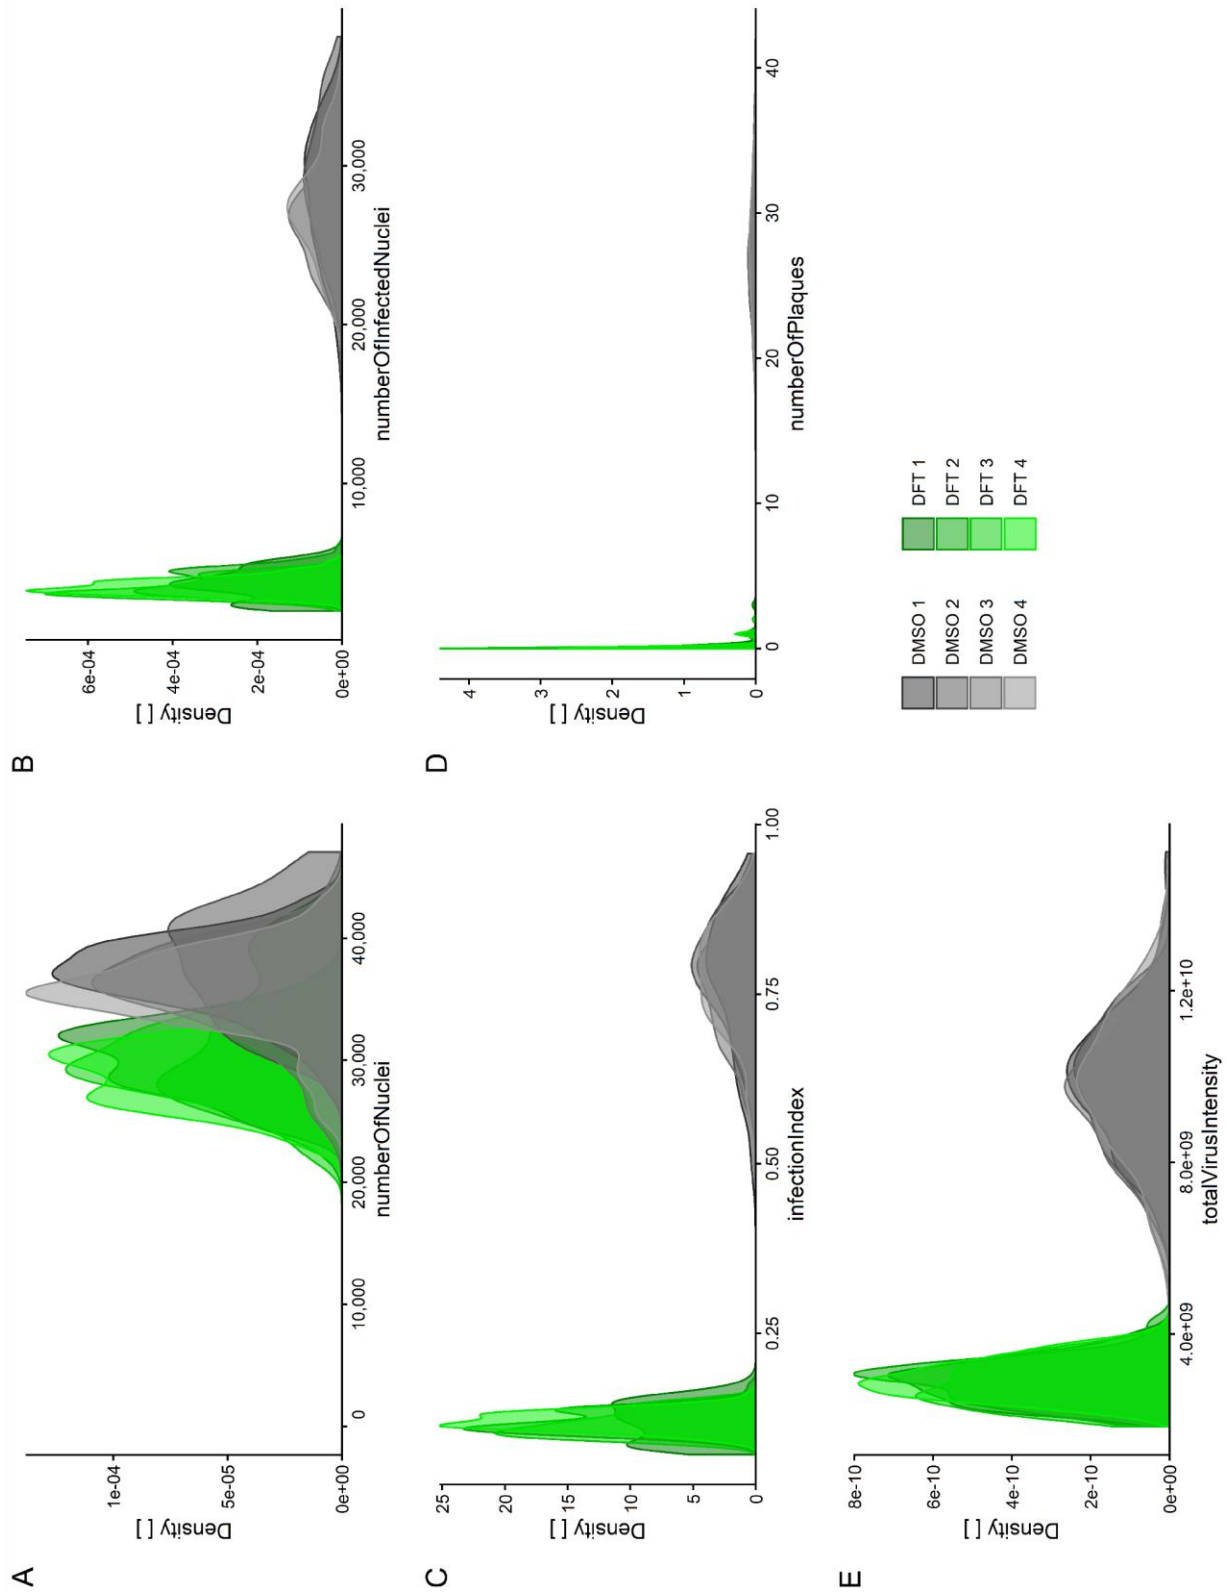

401 **A**  
 402 **Fig. 4: Infection score density of positive and negative controls across screening replicates.**  
 403 Distribution of **A** *numberOfNuclei*, **B** *numberOfInfectedNuclei*, **C** *infectionIndex*, **D** *numberOfPlaques* and  
 404 **E** *totalVirusIntensity* in negative control (0.0125% DMSO in grey) compared to positive control-treated (1.25

405  $\mu\text{M}$  DFT in green) samples of the screening sets. Each set 1 to 4 indicated by colour shading is comprised  
406 of four plates containing 32 technical replicas per control.

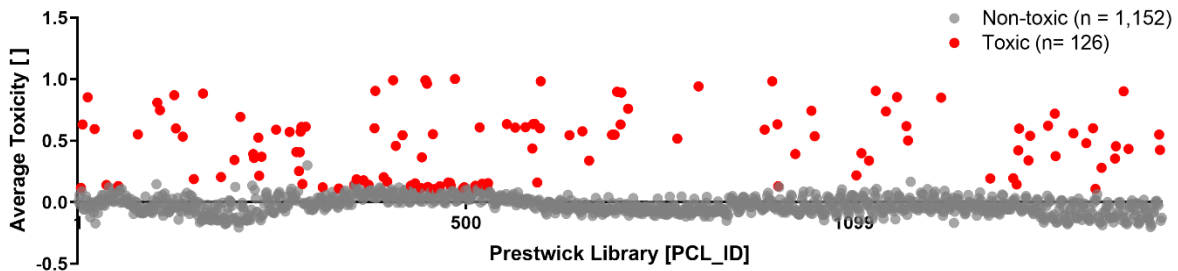

407  
408  
409

**Fig. 5: PCL Toxicity in absence of infection.** Of the 1,278 PCL compounds tested, 126 PCL compounds (shown in red, listed in Table 3) are found to be toxic.

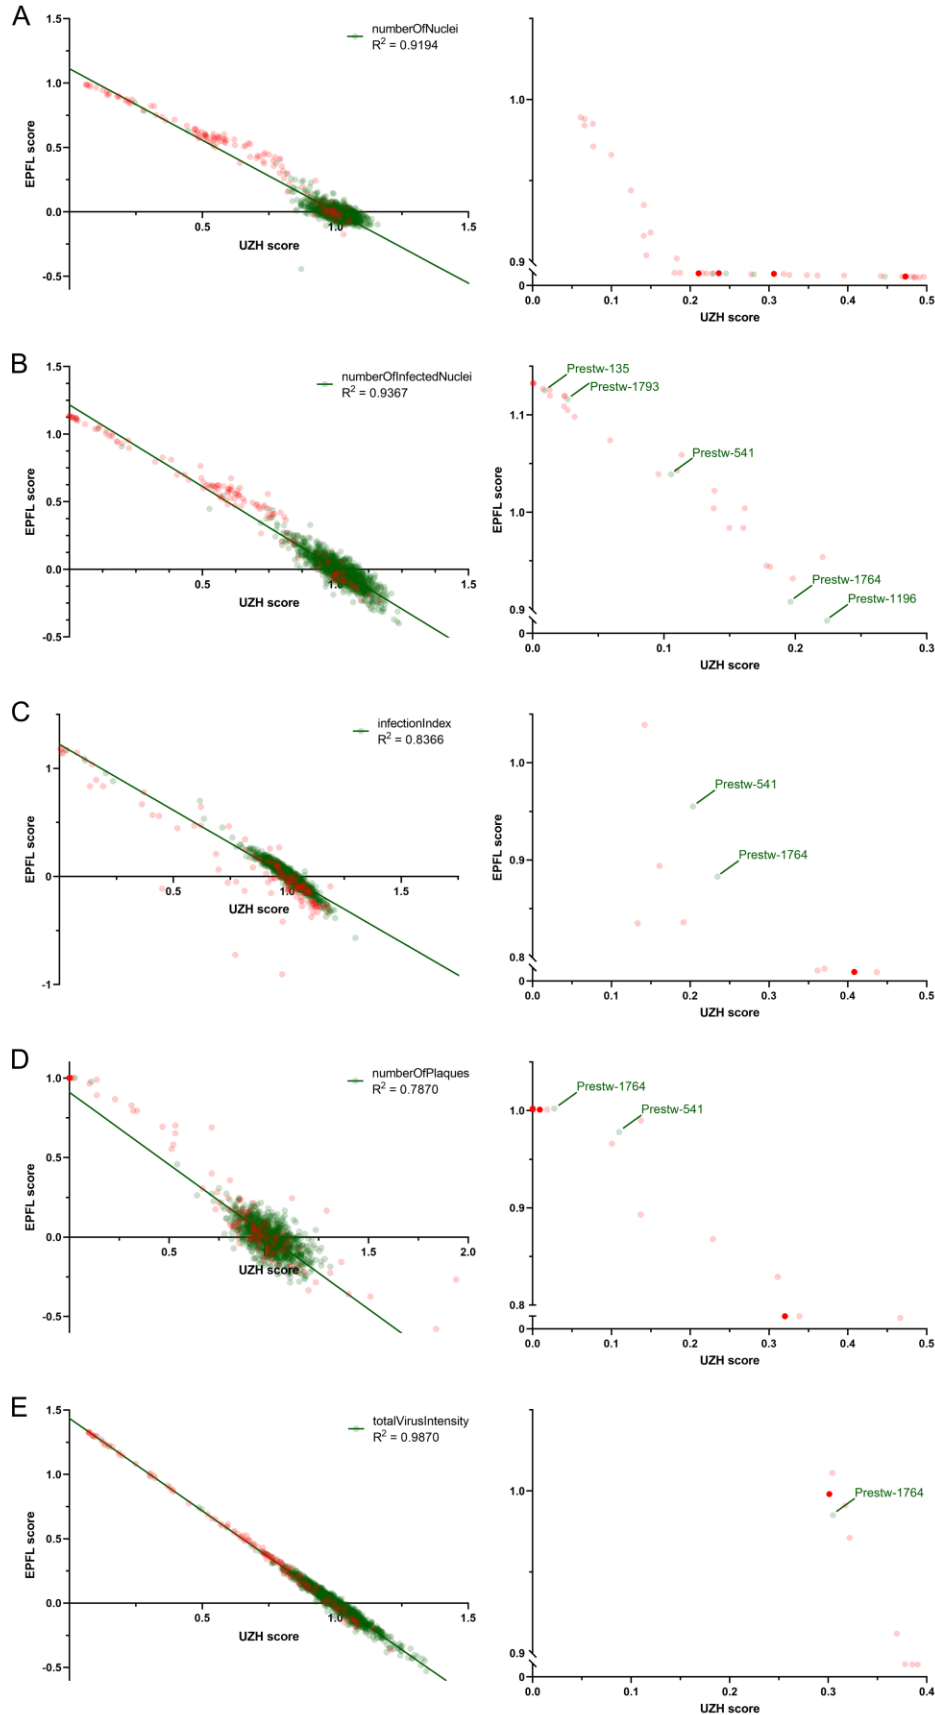

410

411 **Fig. 6: Correlation between PCL scores from independent dry-lab pipelines.** Imaging, image analysis  
412 and data processing is performed independently at UZH and EPFL. PCL-treated infection phenotypes from  
413 4 biological replicates were averaged and normalized against the DMSO solvent control. Obtained scores  
414 for **A** *numberOfNuclei*, **B** *numberOfInfectedNuclei*, **C** *infectionIndex*, **D** *numberOfPlaques* and **E**  
415 *totalVirusIntensity* of the 1,278 tested PCL compounds from UZH and EPFL are correlated via linear  
416 regression (green line),  $R^2$  is calculated using GraphPad Prism 8.2.1. Highest scoring compounds are  
417 shown on the right and *PCL\_ID* of non-toxic compounds indicated. Red dots indicate toxicity in the absence  
418 of infection, non-toxic compounds are shown in green.



419 **Tab. 1: Z'-factors of Z plates.**

420 The quality of the screening platform is assessed prior to screening the PCL by two independent Z' plates  
 421 containing 192 technical replicas of both positive control- (1.25 µM DFT) and negative solvent only control-  
 422 treated (0.0125% DMSO). Z'-factors for the five Plaque2.0 read-outs <sup>29</sup> obtained by independent analysis  
 423 at UZH and EPFL are calculated according to Equation 1 for 3 and 2σ.

| Barcode   | Plate | UZH             |                          |                 |                  |                      | EPFL            |                          |                 |                  |                      |
|-----------|-------|-----------------|--------------------------|-----------------|------------------|----------------------|-----------------|--------------------------|-----------------|------------------|----------------------|
|           |       | 3 sigma         |                          |                 |                  |                      | 3 sigma         |                          |                 |                  |                      |
|           |       | numberOf Nuclei | numberOf Infected Nuclei | infection Index | numberOf Plaques | totalVirus Intensity | numberOf Nuclei | numberOf Infected Nuclei | infection Index | numberOf Plaques | totalVirus Intensity |
| BSF018104 | Za    | -1.11           | 0.50                     | 0.57            | 0.50             | 0.07                 | -1.20           | 0.36                     | 0.47            | 0.52             | 0.08                 |
| BSF018105 | Zb    | -8.10           | 0.30                     | 0.45            | 0.39             | -0.07                | -1.23           | 0.27                     | 0.32            | 0.44             | -0.04                |
| Mean      |       | -4.61           | 0.40                     | 0.51            | 0.44             | 0.00                 | -1.22           | 0.32                     | 0.40            | 0.48             | 0.02                 |
| Barcode   | Plate | UZH             |                          |                 |                  |                      | EPFL            |                          |                 |                  |                      |
|           |       | 2 sigma         |                          |                 |                  |                      | 2 sigma         |                          |                 |                  |                      |
|           |       | numberOf Nuclei | numberOf Infected Nuclei | infection Index | numberOf Plaques | totalVirus Intensity | numberOf Nuclei | numberOf Infected Nuclei | infection Index | numberOf Plaques | totalVirus Intensity |
| BSF018104 | Za    | -0.41           | 0.67                     | 0.71            | 0.67             | 0.07                 | -0.47           | 0.58                     | 0.64            | 0.68             | 0.38                 |
| BSF018105 | Zb    | -5.07           | 0.53                     | 0.63            | 0.59             | -0.07                | -0.49           | 0.52                     | 0.55            | 0.63             | 0.31                 |
| Mean      |       | -2.74           | 0.60                     | 0.67            | 0.63             | 0.00                 | -0.48           | 0.55                     | 0.60            | 0.66             | 0.35                 |

424

425 **Tab. 2: Z'-factors of screening plates.**

426 The quality of the screening data is quantified for each screening plate based on the 32 technical replicas  
 427 of both positive control- (1.25  $\mu$ M DFT) and negative solvent only control-treated (0.0125% DMSO) included  
 428 in each plate. Z'-factors for the five Plaque2.0 read-outs<sup>29</sup> obtained by independent analysis at UZH and  
 429 EPFL are calculated according to Equation (1) for  $3\sigma$ .

| Barcode   | Plate | UZH                |                                |                    |                     |                         | EPFL               |                                |                    |                     |                         |
|-----------|-------|--------------------|--------------------------------|--------------------|---------------------|-------------------------|--------------------|--------------------------------|--------------------|---------------------|-------------------------|
|           |       | numberOf<br>Nuclei | numberOf<br>Infected<br>Nuclei | infection<br>Index | numberOf<br>Plaques | totalVirus<br>Intensity | numberOf<br>Nuclei | numberOf<br>Infected<br>Nuclei | infection<br>Index | numberOf<br>Plaques | totalVirus<br>Intensity |
| BSF018292 | 1A    | -0.13              | 0.58                           | 0.58               | 0.59                | 0.35                    | -0.14              | 0.51                           | 0.49               | 0.58                | 0.31                    |
| BSF018293 | 1B    | -0.88              | 0.58                           | 0.65               | 0.55                | 0.34                    | -0.35              | 0.51                           | 0.52               | 0.51                | 0.35                    |
| BSF018294 | 1C    | -1.01              | 0.62                           | 0.62               | 0.63                | 0.33                    | -0.74              | 0.52                           | 0.50               | 0.66                | 0.32                    |
| BSF018295 | 1D    | -0.34              | 0.56                           | 0.54               | 0.45                | 0.16                    | -0.21              | 0.43                           | 0.38               | 0.46                | 0.19                    |
| BSF018296 | 2A    | -1.35              | 0.64                           | 0.67               | 0.55                | 0.30                    | -0.20              | 0.57                           | 0.55               | 0.55                | 0.28                    |
| BSF018297 | 2B    | -3.63              | 0.56                           | 0.52               | 0.45                | 0.14                    | -1.20              | 0.45                           | 0.39               | 0.40                | 0.12                    |
| BSF018298 | 2C    | -1.81              | 0.60                           | 0.58               | 0.49                | 0.24                    | -0.38              | 0.52                           | 0.42               | 0.52                | 0.19                    |
| BSF018299 | 2D    | -1.94              | 0.57                           | 0.57               | 0.57                | 0.24                    | -0.22              | 0.50                           | 0.43               | 0.63                | 0.20                    |
| BSF018300 | 3A    | -1.74              | 0.64                           | 0.66               | 0.56                | 0.36                    | -0.54              | 0.55                           | 0.51               | 0.59                | 0.34                    |
| BSF018301 | 3B    | -1.13              | 0.60                           | 0.68               | 0.58                | 0.40                    | -0.09              | 0.52                           | 0.57               | 0.59                | 0.40                    |
| BSF018302 | 3C    | -4.02              | 0.66                           | 0.68               | 0.48                | 0.42                    | -1.07              | 0.63                           | 0.60               | 0.50                | 0.41                    |
| BSF018303 | 3D    | -2.36              | 0.55                           | 0.63               | 0.51                | 0.36                    | -0.10              | 0.58                           | 0.54               | 0.52                | 0.35                    |
| BSF018304 | 4A    | -0.68              | 0.70                           | 0.74               | 0.42                | 0.37                    | -0.29              | 0.56                           | 0.58               | 0.48                | 0.36                    |
| BSF018305 | 4B    | -0.17              | 0.71                           | 0.74               | 0.51                | 0.50                    | -0.50              | 0.63                           | 0.67               | 0.50                | 0.50                    |
| BSF018306 | 4C    | -0.44              | 0.61                           | 0.62               | 0.50                | 0.28                    | -0.28              | 0.50                           | 0.48               | 0.47                | 0.26                    |
| BSF018307 | 4D    | -0.77              | 0.63                           | 0.70               | 0.42                | 0.41                    | -0.22              | 0.54                           | 0.56               | 0.36                | 0.39                    |
| Mean      |       | -1.40              | 0.61                           | 0.64               | 0.52                | 0.32                    | -0.41              | 0.53                           | 0.51               | 0.52                | 0.31                    |

430

431 **Tab. 3: PCL compounds excluded due to toxicity in absence of infection. Presto-blue raw data is**  
 432 **available at *ScreenA/4-Toxicity*.**

| PCL_ID      | Compound                             | Score | ScoreSD | Toxic | PCL_ID     | Compound                     | Score | ScoreSD | Toxic |
|-------------|--------------------------------------|-------|---------|-------|------------|------------------------------|-------|---------|-------|
| Prestw-100  | Nocodazole                           | 0.75  | 0.02    | yes   | Prestw-347 | Thioguanosine                | 0.18  | 0.03    | yes   |
| Prestw-1020 | Rimexolone                           | 0.39  | 0.08    | yes   | Prestw-353 | Moclobemide                  | 0.14  | 0.02    | yes   |
| Prestw-1040 | Pyriminium pamoate                   | 0.74  | 0.03    | yes   | Prestw-362 | Betamethasone                | 0.60  | 0.03    | yes   |
| Prestw-1044 | Prednicarbate                        | 0.54  | 0.00    | yes   | Prestw-363 | Colchicine                   | 0.91  | 0.00    | yes   |
| Prestw-1104 | Clonixin Lysinate                    | 0.22  | 0.05    | yes   | Prestw-373 | Amethopterin (R,S)           | 0.20  | 0.01    | yes   |
| Prestw-1110 | Parbendazole                         | 0.40  | 0.02    | yes   | Prestw-377 | Nafronyl oxalate             | 0.17  | 0.03    | yes   |
| Prestw-1119 | Clocortolone pivalate                | 0.34  | 0.04    | yes   | Prestw-385 | Mitoxantrone dihydrochloride | 0.99  | 0.00    | yes   |
| Prestw-1134 | Cytarabine                           | 0.91  | 0.00    | yes   | Prestw-388 | Dequalinium dichloride       | 0.46  | 0.00    | yes   |
| Prestw-1159 | Sibutramine HCl                      | 0.74  | 0.06    | yes   | Prestw-396 | Etoposide                    | 0.55  | 0.02    | yes   |
| Prestw-118  | Nalbuphine hydrochloride             | 0.87  | 0.00    | yes   | Prestw-4   | Metformin hydrochloride      | 0.12  | 0.00    | yes   |
| Prestw-1180 | Docetaxel                            | 0.86  | 0.03    | yes   | Prestw-409 | Amiodarone hydrochloride     | 0.14  | 0.02    | yes   |
| Prestw-1196 | Topotecan                            | 0.62  | 0.04    | yes   | Prestw-419 | Bisacodyl                    | 0.15  | 0.01    | yes   |
| Prestw-1198 | Tranilast                            | 0.50  | 0.02    | yes   | Prestw-430 | Cisapride                    | 0.12  | 0.02    | yes   |
| Prestw-12   | Benzonate                            | 0.85  | 0.06    | yes   | Prestw-432 | Corticosterone               | 0.37  | 0.01    | yes   |
| Prestw-120  | Triamcinolone                        | 0.60  | 0.03    | yes   | Prestw-436 | Digitoxigenin                | 0.99  | 0.00    | yes   |
| Prestw-1266 | Gemcitabine                          | 0.85  | 0.01    | yes   | Prestw-437 | Digoxin                      | 0.98  | 0.00    | yes   |
| Prestw-130  | Dexamethasone acetate                | 0.53  | 0.02    | yes   | Prestw-438 | Doxorubicin hydrochloride    | 0.96  | 0.00    | yes   |
| Prestw-1362 | Vorinostat                           | 0.19  | 0.01    | yes   | Prestw-439 | Carbimazole                  | 0.13  | 0.00    | yes   |
| Prestw-1408 | Etoricoxib                           | 0.20  | 0.03    | yes   | Prestw-447 | Hydrocortisone base          | 0.55  | 0.02    | yes   |
| Prestw-1415 | Floxuridine                          | 0.15  | 0.04    | yes   | Prestw-448 | Hydroxytacrine maleate (R,S) | 0.11  | 0.00    | yes   |
| Prestw-1417 | Fluconazole                          | 0.42  | 0.01    | yes   | Prestw-456 | Meclocycline sulfosalicylate | 0.11  | 0.01    | yes   |
| Prestw-1419 | Fluocinolone acetonide               | 0.60  | 0.03    | yes   | Prestw-457 | Meclozine dihydrochloride    | 0.11  | 0.02    | yes   |
| Prestw-143  | Chlorhexidine                        | 0.19  | 0.02    | yes   | Prestw-458 | Melatonin                    | 0.13  | 0.01    | yes   |
| Prestw-1435 | Melengestrol acetate                 | 0.34  | 0.05    | yes   | Prestw-476 | Primaquine diphosphate       | 0.16  | 0.01    | yes   |
| Prestw-1443 | Misoprostol                          | 0.54  | 0.05    | yes   | Prestw-478 | Felodipine                   | 0.16  | 0.01    | yes   |
| Prestw-1476 | Amcinonide                           | 0.62  | 0.02    | yes   | Prestw-48  | Dicyclomine hydrochloride    | 0.13  | 0.03    | yes   |
| Prestw-1484 | Cladribine                           | 0.72  | 0.03    | yes   | Prestw-481 | Serotonin hydrochloride      | 0.13  | 0.01    | yes   |
| Prestw-1486 | Cortisol acetate                     | 0.38  | 0.08    | yes   | Prestw-487 | Daurorubicin hydrochloride   | 1.00  | 0.00    | yes   |
| Prestw-1509 | Deflazacort                          | 0.56  | 0.01    | yes   | Prestw-497 | Vancomycin hydrochloride     | 0.12  | 0.02    | yes   |
| Prestw-155  | Paclitaxel                           | 0.88  | 0.02    | yes   | Prestw-498 | Artemisinin                  | 0.12  | 0.00    | yes   |
| Prestw-1704 | Desonide                             | 0.48  | 0.06    | yes   | Prestw-513 | Norcyclobenzaprine           | 0.13  | 0.00    | yes   |
| Prestw-1712 | Flumethasone pivalate                | 0.60  | 0.02    | yes   | Prestw-514 | Pyrazinamide                 | 0.11  | 0.01    | yes   |
| Prestw-1715 | Algestone acetophenide               | 0.11  | 0.00    | yes   | Prestw-518 | Budesonide                   | 0.61  | 0.00    | yes   |
| Prestw-1722 | Azataidine maleate                   | 0.28  | 0.13    | yes   | Prestw-522 | Thiostrepton                 | 0.15  | 0.01    | yes   |
| Prestw-1740 | Besifloxacin hydrochloride           | 0.36  | 0.09    | yes   | Prestw-529 | Mesoridazine besylate        | 0.13  | 0.00    | yes   |
| Prestw-1741 | Loteprednol etabonate                | 0.46  | 0.05    | yes   | Prestw-530 | Trolox                       | 0.16  | 0.00    | yes   |
| Prestw-1752 | Epirubicin hydrochloride             | 0.90  | 0.02    | yes   | Prestw-553 | Pentamidine isethionate      | 0.64  | 0.01    | yes   |
| Prestw-176  | Iproniazide phosphate                | 0.21  | 0.11    | yes   | Prestw-572 | Mometasone furoate           | 0.61  | 0.00    | yes   |
| Prestw-1761 | Rizatriptan benzoate                 | 0.43  | 0.00    | yes   | Prestw-6   | Isoflupredone acetate        | 0.63  | 0.01    | yes   |
| Prestw-1801 | Ciclesonide                          | 0.55  | 0.03    | yes   | Prestw-619 | Diflorasone Diacetate        | 0.61  | 0.00    | yes   |
| Prestw-1802 | Darunavir                            | 0.43  | 0.06    | yes   | Prestw-641 | Sulmazole                    | 0.44  | 0.01    | yes   |
| Prestw-192  | Thalidomide                          | 0.34  | 0.09    | yes   | Prestw-643 | Flunisolide                  | 0.64  | 0.01    | yes   |
| Prestw-20   | Minoxidil                            | 0.60  | 0.01    | yes   | Prestw-645 | Flurandrenolide              | 0.64  | 0.01    | yes   |
| Prestw-200  | Campothecin (S,+)                    | 0.69  | 0.02    | yes   | Prestw-652 | Picrotoxinin                 | 0.16  | 0.07    | yes   |
| Prestw-216  | Tiapride hydrochloride               | 0.39  | 0.02    | yes   | Prestw-655 | Halcinonide                  | 0.60  | 0.01    | yes   |
| Prestw-217  | Mebendazole                          | 0.36  | 0.02    | yes   | Prestw-656 | Lanatoside C                 | 0.98  | 0.00    | yes   |
| Prestw-222  | Antimycin A                          | 0.53  | 0.08    | yes   | Prestw-718 | Fluorometholone              | 0.55  | 0.03    | yes   |
| Prestw-223  | Xylometazoline hydrochloride         | 0.22  | 0.09    | yes   | Prestw-72  | Imipramine hydrochloride     | 0.55  | 0.00    | yes   |
| Prestw-226  | Griseofulvin                         | 0.37  | 0.07    | yes   | Prestw-734 | Flumethasone                 | 0.58  | 0.04    | yes   |
| Prestw-244  | Glutethimide, para-amino             | 0.59  | 0.00    | yes   | Prestw-743 | Medrysone                    | 0.34  | 0.01    | yes   |
| Prestw-260  | Praziquantel                         | 0.57  | 0.05    | yes   | Prestw-771 | Alclometasone dipropionate   | 0.55  | 0.02    | yes   |
| Prestw-268  | Vinpocetine                          | 0.41  | 0.01    | yes   | Prestw-774 | Fluocinonide                 | 0.55  | 0.03    | yes   |
| Prestw-271  | Vincamine                            | 0.25  | 0.00    | yes   | Prestw-777 | Alexidine dihydrochloride    | 0.90  | 0.00    | yes   |
| Prestw-272  | Indomethacin                         | 0.41  | 0.00    | yes   | Prestw-781 | Clobetasol propionate        | 0.63  | 0.00    | yes   |
| Prestw-273  | Cortisone                            | 0.57  | 0.01    | yes   | Prestw-782 | Podophyllotoxin              | 0.89  | 0.00    | yes   |
| Prestw-274  | Prednisolone                         | 0.61  | 0.00    | yes   | Prestw-790 | Cycloheximide                | 0.76  | 0.01    | yes   |
| Prestw-275  | Fenofibrate                          | 0.15  | 0.01    | yes   | Prestw-855 | Beclomethasone dipropionate  | 0.52  | 0.02    | yes   |
| Prestw-279  | Methylprednisolone, 6-alpha          | 0.61  | 0.00    | yes   | Prestw-883 | Digoxigenin                  | 0.94  | 0.00    | yes   |
| Prestw-299  | Mifepristone                         | 0.12  | 0.01    | yes   | Prestw-97  | Disulfiram                   | 0.81  | 0.04    | yes   |
| Prestw-318  | Quinacrine dihydrochloride dihydrate | 0.11  | 0.03    | yes   | Prestw-975 | Naftopidil dihydrochloride   | 0.59  | 0.01    | yes   |
| Prestw-337  | Procainamide hydrochloride           | 0.14  | 0.01    | yes   | Prestw-986 | Proscillaridin A             | 0.98  | 0.00    | yes   |
| Prestw-339  | Guanfacine hydrochloride             | 0.19  | 0.01    | yes   | Prestw-997 | Fluticasone propionate       | 0.63  | 0.02    | yes   |
| Prestw-34   | Triamterene                          | 0.14  | 0.00    | yes   | Prestw-998 | Zuclopenthixol hydrochloride | 0.13  | 0.01    | yes   |

433

434 **Tab. 4: Summary of screening controls and top hits. Compounds are scored toxic, if they show**  
 435 **significant toxicity in either of the assays.** Mean correspond to means over four biological replicates of  
 436 PCL compound and 16 biological replicates each carrying 16 technical replicates for each control. Neg. ctr.  
 437 refers to negative control (DMSO), pos. ctr. to positive control (DFT). Normalized indicates each com-  
 438 pound's mean read-outs relative to the mean of the positive control. Toxicity is accessed by presto-blue  
 439 assay of 72 h treatment of non-infected A549 cells as well as by the nuclei Z'-factor in the screen. Hits are  
 440 selected for low toxicity and high inhibitory effect compared to solvent control.

| PCL_ID      | compound Identifier | Compound               | Group     | Toxic | Analysis | Mean read-outs |                 |                 |         |                      | Normalized mean read-outs |                 |                 |         |                      | Hit    |                 |                 |         |
|-------------|---------------------|------------------------|-----------|-------|----------|----------------|-----------------|-----------------|---------|----------------------|---------------------------|-----------------|-----------------|---------|----------------------|--------|-----------------|-----------------|---------|
|             |                     |                        |           |       |          | Nuclei         | Infected nuclei | Infection index | Plaques | Virus intensity [AU] | Nuclei                    | Infected nuclei | Infection index | Plaques | Virus intensity [AU] | Nuclei | Infected nuclei | Infection index | Plaques |
| DMSO        | DMSO                | DMSO                   | neg. ctr. | no    | UZH      | 36'399         | 27'911          | 0.77            | 27.32   | 9.79E+09             | 1.00                      | 1.00            | 1.00            | 1.00    | 1.00                 | 1.00   | -               | -               | -       |
| DFT         | DFT                 | DFT                    | pos. ctr. | no    | EPFL     | 29'749         | 15'156          | 0.51            | 21.11   | 5.02E+09             | 1.00                      | 1.00            | 1.00            | 1.00    | 1.00                 | 1.00   | -               | -               | -       |
| Prestw-1764 | 497                 | Nelfinavir mesylate    | PCL       | no    | UZH      | 30'204         | 3'595           | 0.12            | 0.12    | 2.90E+09             | 0.83                      | 0.13            | 0.15            | 0.00    | 0.30                 | -      | -               | -               | -       |
| Prestw-388  | 763                 | Dequalinium dichloride | PCL       | yes   | UZH      | 20'745         | 1'776           | 0.09            | 0.03    | 1.62E+09             | 0.70                      | 0.12            | 0.17            | 0.00    | 0.32                 | -      | -               | -               | -       |
| Prestw-1717 | 452                 | Aminacrine             | PCL       | no    | EPFL     | 30'908         | 5'479           | 0.18            | 0.75    | 2.98E+09             | 0.85                      | 0.20            | 0.23            | 0.03    | 0.30                 | no     | yes             | yes             | yes     |
| Prestw-925  | 1214                | Thiozonium bromide     | PCL       | no    | UZH      | 21'247         | 4'988           | 0.23            | 9.25    | 1.92E+09             | 0.71                      | 0.33            | 0.46            | 0.44    | 0.38                 | no     | yes             | yes             | yes     |
|             |                     |                        |           |       | EPFL     | 31'723         | 14'689          | 0.47            | 20.50   | 4.88E+09             | 0.87                      | 0.53            | 0.62            | 0.75    | 0.50                 | no     | yes             | yes             | yes     |
|             |                     |                        |           |       | UZH      | 42'191         | 9'057           | 0.22            | 14.25   | 2.54E+09             | 1.42                      | 0.60            | 0.42            | 0.67    | 0.51                 | no     | no              | yes             | no      |
|             |                     |                        |           |       | EPFL     | 30'644         | 15'057          | 0.49            | 14.75   | 4.77E+09             | 0.84                      | 0.54            | 0.63            | 0.54    | 0.49                 | no     | yes             | yes             | no      |
|             |                     |                        |           |       | EPFL     | 24'093         | 6'849           | 0.28            | 11.75   | 2.51E+09             | 0.81                      | 0.45            | 0.56            | 0.56    | 0.50                 | no     | yes             | no              | no      |

441

442 **Suppl. Tab. 1: PCL compounds tested in the screening procedure.** PCL catalogue IDs (*PCL\_ID*),  
443 compound names (*CompoundName*) and spottability flag (*SpottabilityFlag*) for the 1,280 compounds of the  
444 PCL. Two compounds, namely Prestw-354 (Clopamide) and Prestw-410 (Amphotericine B) could not be  
445 successfully transferred via acoustic dispensing e.g. due to precipitation and were therefore not included in  
446 the screening.

447  
448 **Suppl. Tab. 2: UZH HAdV screening infection scores.**

449  
450 **Suppl. Tab. 3: Scored UZH PCL-treated HAdV infection phenotype.**

451  
452 **Suppl. Tab. 4: EPFL HAdV screening infection scores.**

453  
454 **Suppl. Tab. 5: Scored EPFL PCL-treated HAdV infection phenotype.**



455 **References:**

- 456 1. The Image Data Resource (IDR). *The Image Data Resource (IDR)* at  
457 <<https://idr.openmicroscopy.org/>>
- 458 2. Krilov, L. R. Adenovirus infections in the immunocompromised host. *Pediatr. Infect. Dis. J.* **24**, 555–  
459 556 (2005).
- 460 3. Greber, U. F., Arnberg, N., Wadell, G., Benkő, M. & Kremer, E. J. Adenoviruses - from pathogens to  
461 therapeutics: a report on the 10th International Adenovirus Meeting. *Cell Microbiol.* **15**, 16–23  
462 (2013).
- 463 4. Tunkel, A. R., Baron, E. L., Buch, K. A., Marty, F. M. & Martinez-Lage, M. Case 31-2019: A 45-Year-  
464 Old Woman with Headache and Somnolence. *N. Engl. J. Med.* **381**, 1459–1470 (2019).
- 465 5. Gray, G. C. *et al.* Genotype prevalence and risk factors for severe clinical adenovirus infection,  
466 United States 2004-2006. *Clin. Infect. Dis.* **45**, 1120–1131 (2007).
- 467 6. Metzgar, D. *et al.* Abrupt emergence of diverse species B adenoviruses at US military recruit training  
468 centers. *J. Infect. Dis.* **196**, 1465–1473 (2007).
- 469 7. Lynch, J. P. & Kajon, A. E. Adenovirus: epidemiology, global spread of novel serotypes, and  
470 advances in treatment and prevention. *Semin Respir Crit Care Med* **37**, 586–602 (2016).
- 471 8. Haque, E., Banik, U., Monowar, T., Anthony, L. & Adhikary, A. K. Worldwide increased prevalence of  
472 human adenovirus type 3 (HAdV-3) respiratory infections is well correlated with heterogeneous  
473 hypervariable regions (HVRs) of hexon. *PLoS One* **13**, e0194516 (2018).
- 474 9. Ginn, S. L., Amaya, A. K., Alexander, I. E., Edelstein, M. & Abedi, M. R. Gene therapy clinical trials  
475 worldwide to 2017: An update. *J Gene Med* **20**, e3015 (2018).
- 476 10. Jiang, H. *et al.* Oncolytic adenovirus research evolution: from cell-cycle checkpoints to immune  
477 checkpoints. *Curr Opin Virol* **13**, 33–39 (2015).
- 478 11. Lawler, S. E., Speranza, M.-C., Cho, C.-F. & Chiocca, E. A. Oncolytic viruses in cancer treatment: A  
479 review. *JAMA Oncol.* **3**, 841–849 (2017).
- 480 12. Mennechet, F. J. D. *et al.* A review of 65 years of human adenovirus seroprevalence. *Expert Rev.*  
481 *Vaccines* **18**, 597–613 (2019).
- 482 13. Lion, T. Adenovirus persistence, reactivation, and clinical management. *FEBS Lett.* (2019).  
483 doi:10.1002/1873-3468.13576
- 484 14. Ismail, A. M. *et al.* Genomic foundations of evolution and ocular pathogenesis in human adenovirus  
485 species D. *FEBS Lett.* **593**, 3583–3608 (2019).
- 486 15. Harrach, B., Tarján, Z. L. & Benkő, M. Adenoviruses across the animal kingdom: a walk in the zoo.  
487 *FEBS Lett.* (2019). doi:10.1002/1873-3468.13687
- 488 16. Reddy, V. S., Natchiar, S. K., Stewart, P. L. & Nemerow, G. R. Crystal structure of human  
489 adenovirus at 3.5 Å resolution. *Science* **329**, 1071–1075 (2010).
- 490 17. Benevento, M. *et al.* Adenovirus composition, proteolysis, and disassembly studied by in-depth  
491 qualitative and quantitative proteomics. *J. Biol. Chem.* **289**, 11421–11430 (2014).
- 492 18. Greber, U. F. & Flatt, J. W. Adenovirus entry: from infection to immunity. *Annu. Rev. Virol.* **6**, 177–  
493 197 (2019).
- 494 19. Bauer, M. *et al.* The e3 ubiquitin ligase mind bomb 1 controls adenovirus genome release at the  
495 nuclear pore complex. *Cell Rep.* **29**, 3785–3795.e8 (2019).
- 496 20. Prasad, V. *et al.* The UPR sensor IRE1α and the adenovirus E3-19Kglycoprotein sustain persistent  
497 and lytic infections. *Nat. Commun.* (2020).
- 498 21. Yakimovich, A. *et al.* Cell-free transmission of human adenovirus by passive mass transfer in cell  
499 culture simulated in a computer model. *J. Virol.* **86**, 10123–10137 (2012).
- 500 22. Tollefson, A. E. *et al.* The adenovirus death protein (E3-11.6K) is required at very late stages of  
501 infection for efficient cell lysis and release of adenovirus from infected cells. *J. Virol.* **70**, 2296–2306  
502 (1996).
- 503 23. Doronin, K. *et al.* Overexpression of the ADP (E3-11.6K) protein increases cell lysis and spread of  
504 adenovirus. *Virology* **305**, 378–387 (2003).

- 505 24. Lenaerts, L. & Naesens, L. Antiviral therapy for adenovirus infections. *Antiviral Res.* **71**, 172–180  
506 (2006).
- 507 25. Wold, W. S. M., Tollefson, A. E., Ying, B., Spencer, J. F. & Toth, K. Drug development against  
508 human adenoviruses and its advancement by Syrian hamster models. *FEMS Microbiol. Rev.* **43**,  
509 380–388 (2019).
- 510 26. Wall, G. *et al.* Screening a Repurposing Library for Inhibitors of Multidrug-Resistant *Candida auris*  
511 Identifies Ebselen as a Repositionable Candidate for Antifungal Drug Development. *Antimicrob.*  
512 *Agents Chemother.* **62**, (2018).
- 513 27. Chauvin, C. *et al.* High-Throughput Drug Screening Identifies Pazopanib and Clofilium Tosylate as  
514 Promising Treatments for Malignant Rhabdoid Tumors. *Cell Rep.* **21**, 1737–1745 (2017).
- 515 28. Prestwick Chemical publications. *Prestwick Chemical publications* at  
516 <<http://www.prestwickchemical.com/libraries-publications.html>>
- 517 29. Yakimovich, A. *et al.* Plaque2.0-A High-Throughput Analysis Framework to Score Virus-Cell  
518 Transmission and Clonal Cell Expansion. *PLoS One* **10**, e0138760 (2015).
- 519 30. Greber, U. F., Willetts, M., Webster, P. & Helenius, A. Stepwise dismantling of adenovirus 2 during  
520 entry into cells. *Cell* **75**, 477–486 (1993).
- 521 31. R Core Team. *R: A Language and Environment for Statistical Computing*. (R Foundation for  
522 Statistical Computing, 2018).
- 523 32. Berthold, M. R. *et al.* KNIME - the Konstanz information miner. *SIGKDD Explor. Newsl.* **11**, 26  
524 (2009).
- 525
