# High-content image-based drug screen identifies a clinical compound against cell transmission of adenovirus

Fanny Georgi<sup>1</sup>, Fabien Kuttler<sup>2</sup>, Luca Murer<sup>1</sup>, Vardan Andriasyan<sup>1</sup>, Robert Witte<sup>1</sup>, Artur Yakimovich<sup>3,4</sup>, Gerardo Turcatti<sup>2</sup>, Urs F Greber<sup>1</sup>

<sup>1</sup> Department of Molecular Life Sciences, University of Zurich (UZH), Winterthurerstrasse 190, 8057 Zurich, Switzerland

<sup>2</sup> Biomolecular Screening Facility, School of Life Sciences, Ecole Polytechnique Fédérale de Lausanne (EPFL), Station 15, Lausanne 1015, Switzerland

<sup>3</sup> MRC Laboratory for Molecular Cell Biology, University College London, Gower St, London, WC1E 6BT, United Kingdom

<sup>4</sup> Artificial Intelligence for Life Sciences CIC, 40 Gowers walk, London, E1 8BH, United Kingdom

Corresponding author: Urs F Greber, [urs.greber@imls.uzh.ch](mailto:urs.greber@imls.uzh.ch)

## Abstract

Human adenoviruses (HAdVs) are fatal to immuno-suppressed people, but no effective anti-HAdV therapy is available. Here, we present a novel image-based high-throughput screening (HTS) platform, which scores the full viral replication cycle from virus entry to dissemination of progeny. We analysed 1,280 small molecular weight compounds of the Prestwick Chemical Library (PCL) for interference with HAdV-C2 infection in a quadruplicate, blinded format, and included robust image analyses, and hit filtering. We present the entire set of the screening data including all the images, image analyses and data processing pipelines. The data are made available at the Image Data Repository (IDR) <sup>1</sup>, accession number [idr0081](https://www.ebi.ac.uk/ids/idr0081). Our screen identified Nelfinavir mesylate as an inhibitor of HAdV-C2 multi-round plaque formation, but not single round infection. Nelfinavir has been FDA-approved for anti-retroviral therapy in humans. Our results underscore the power of image-based full cycle infection assays in identifying viral inhibitors with clinical potential.

## 31 **Background & Summary**

32 Human adenoviruses (HAdVs) affect the respiratory, urinary and gastrointestinal tracts and the  
33 eyes. They cause morbidity and mortality, especially to immuno-compromised patients <sup>2,3</sup> as  
34 indicated by a recent outbreak in the USA killing 12 children, or a recent case of meningoen-  
35 cephalitis in a middle-aged woman in the US <sup>4</sup>. HAdVs have a high prevalence <sup>5-8</sup> and are broadly  
36 used as gene therapy and vaccination vectors as well as oncolytic viruses <sup>9-11</sup>. The high  
37 seroprevalence of HAdV-C2 and C5 (species C, types 2 and 5) underlines that HAdV infections  
38 are asymptomatic in healthy individuals, but persist in mucosal lymphocytes, and thereby pose a  
39 risk for immunosuppressed patients undergoing stem cell transplantation <sup>12,13</sup>. More than 100  
40 HAdV genotypes are grouped into seven species based on hemagglutination assays and genome  
41 sequences <sup>14,15</sup>. Types of the species A, F and G replicate in the gastrointestinal tract, B, C and  
42 E in the respiratory tract, and B and D in the conjunctiva of the eyes. Notably, species B members  
43 have a broad tropism, including kidney and hematopoietic cells <sup>7,13</sup>.

44  
45 HAdV has a double-stranded DNA genome of ~36 kbp tightly packaged into an icosahedral  
46 protein capsid of about 90 nm in diameter <sup>16,17</sup>. HAdV-C2 and C5 enter cells by receptor-mediated  
47 endocytosis, shed minor capsid proteins, expose the membrane lytic protein, penetrate the  
48 endosomal membrane and are transported to the nuclear membrane, where they uncoat and  
49 release their genome to the nucleus <sup>18-21</sup>. In the nucleus, the viral genome gives rise to the  
50 immediate early viral mRNA encoding the E1A protein which transactivates the subviral  
51 promoters, drives lytic infection and maintains genome persistence in presence of interferon <sup>22-</sup>  
52 <sup>24</sup>. Proteolytically matured HAdV progeny is released upon rupture of the nuclear envelope and  
53 the plasma membrane <sup>25-27</sup>.

54  
55 Currently, there is no effective therapy available against HAdV disease. The standard of care is  
56 the nucleoside analogue Cidofovir, with poor clinical efficacy <sup>7,28</sup>. The problem is exacerbated by  
57 the shortage of a suitable small animal model for HAdV disease, although Syrian Hamsters are  
58 susceptible to HAdV-C infection and give rise to viral progeny <sup>29</sup>. Here, we developed an image-  
59 based procedure to identify novel inhibitors of HAdV infection in cell culture. We used the  
60 commercially available Prestwick Chemical Library (PCL) comprising 1,280 off-patent mostly  
61 FDA-approved small molecules (listed in Supplementary Table 1). The PCL comprises com-  
62 pounds against diseases including infection and cancer <sup>30-32</sup>.

63  
64 Here, we performed a phenotypic screen against HAdV-C2 infection employing automated  
65 fluorescence microscopy and image-based scoring of the progression of multi-round infections  
66 using the Plaque2.0 software <sup>33</sup> (Figure 1a and b). The screen was performed in 384-well plates  
67 (for representative images, see Figure 1c). It features robust imaging, image analysis and data  
68 processing, as concluded from two parallel procedures carried out at independent institutions, the  
69 Department of Molecular Life Sciences at University of Zurich (UZH), and the Biomolecular  
70 Screening Facility at Ecole Polytechnique Fédérale de Lausanne (EPFL).

71  
72 Five phenotypic features were used to score the effects of the compounds on HAdV-C2-dE3B-  
73 GFP infected human lung cancer epithelial A549 cells – the number of infected and uninfected  
74 cell nuclei, the infection index (infected nuclei per total nuclei), the number of plaques (areas of  
75 infection foci originating from a single infected cell) and the integrated signal of the infection

76 marker green fluorescence protein (GFP) encoded in the reporter virus genome. All data are  
77 available at the Image Data repository (IDR) <sup>1</sup>, IDR accession number idr0081, and can be  
78 accessed via the IDR web client. Raw and scored infection phenotypes are provided for UZH and  
79 EPFL analyses. Rigorous assay development ensured a high assay quality, as indicated by mean  
80 Z'-factors of 0.52 for the plaque numbers. The screening was performed in four biological  
81 replicates at high reproducibility, and compounds that gave significant toxicity in uninfected cells  
82 were excluded during hit filtering. Imaging, image analysis and scoring by the two independent  
83 teams yielded well correlated scores and a congruent list of top hits, provided in Table 1. We  
84 confirmed the antiviral efficacy of Nelfinavir in a follow-up study (Georgi et al., in preparation).

85  
86

## 87 **Methods**

88

### 89 **Virus**

90 HAdV-C2-dE3B-GFP was produced as described <sup>25</sup> and fully sequenced (GenBank accession  
91 number MT277585). In brief, the virus was generated by exchange of the viral E3B genome region  
92 with a reporter cassette harbouring the enhanced green fluorescent protein (GFP) under the  
93 immediate early Cytomegalovirus (CMV) promoter <sup>25</sup>. The virus was grown in A549 cells and  
94 purified by double caesium chloride gradient centrifugation <sup>34</sup>. Aliquots supplemented with 10%  
95 glycerol (v/v) were stored at -80°C. HAdV-C2-dE3B-GFP was found to be homogeneous by SDS-  
96 PAGE and negative-stain analyses by transmission electron microscopy.

97

### 98 **Cell culture**

99 A549 (human adenocarcinomic alveolar basal epithelium) cells were obtained from the American  
100 Type Culture Collection (ATCC), Manassas, USA. The cells were maintained in full medium: high  
101 glucose Dulbecco Modified Eagle Medium (DMEM; Thermo Fisher Scientific, Waltham, USA)  
102 containing 7.5% fetal bovine serum (FBS, Invitrogen, Carlsbad, USA), 1% L-glutamine (Sigma-  
103 Aldrich, St. Louis, USA) and 1% penicillin streptomycin (Sigma-Aldrich, St. Louis, USA) and  
104 subcultured following PBS washing and trypsinisation (Trypsin-EDTA, Sigma-Aldrich, St. Louis,  
105 USA) weekly. Cells were grown at standard conditions (37°C, 5% CO<sub>2</sub>, 95% humidity) and  
106 passage number kept below 20.

107

### 108 **Preparation of pre-plates**

109 Ten µl 0.0125% DMSO in PBS was spotted on all 384 wells each of imaging-compatible 384-well  
110 plates (Matrix plates #4332, Thermo Fisher Scientific, Waltham, USA) using a Matrix WellMate  
111 dispenser and normal bore Matrix WellMate tubing cartridges (Thermo Fisher Scientific, Waltham,  
112 USA). Plates were sealed and stored at -20°C.

113

### 114 **Blinding**

115 The PCL compound arrangement as dispensed by EPFL in four subset plates A - D comprising  
116 each screening set replicate 1 - 4 was blinded and replaced by UZH with internal identifier  
117 (Supplementary Tables 2 and 3, *compoundIdentifier* 1 to 1280). The identity of the compounds  
118 was only disclosed after the screening process and hit filtering (Supplementary Tables 2 and 3  
119 and Table 1, *PCL\_ID* Prestw-1 to Prestw-1804 and *compoundName*).

120

## 121 **Compounds**

122 The PCL was obtained from Prestwick Chemical (Illkirch, France). 3'-deoxy-3'-fluorothymidine  
123 (DFT, CAS number 25526-93-6) was obtained from Toronto Research Chemical, North York,  
124 Canada. All compounds were dissolved in dimethyl sulfoxide (DMSO, Sigma-Aldrich, St. Louis,  
125 USA) at a final stock concentration of 10 mM and stored at -20°C.

126

## 127 **Presto-blue toxicity assay**

128 Toxicity of the PCL chemical compounds on uninfected A549 cells was tested using the Presto  
129 Blue Cell Viability reagent (Thermo Fisher Scientific, Waltham, USA). Briefly, following 3.5-day  
130 continuous treatment of A549 cells with compounds at concentrations and cell densities as in the  
131 screening protocol, 10% final PrestoBlue was added to each well and incubated for 1 h at standard  
132 cell incubation conditions. Fluorescence intensity (bottom-read) was measured using a multi-well  
133 plate reader (Tecan Infinite F500, Tecan, Männedorf, Switzerland) with excitation at 560/10 nm,  
134 emission at 590/10 nm at a fixed gain. Doxorubicin hydrochloride (Prestw-438, Prestwick  
135 Chemical, Illkirch, France) was used as a positive control for cytotoxicity, at a final concentration  
136 of 10  $\mu$ M, and the corresponding concentration of the drug solvent DMSO was used as a negative  
137 control. The full PCL library was tested on duplicated plates. The EPFL-BSF in-house Laboratory  
138 Information Management System (LIMS) was used for data processing and statistical validation.  
139 First, raw PrestoBlue readings were normalized per plate to negative control values at 0 and  
140 positive controls at 1. Then, the normalized values of the duplicates were averaged. Assay quality  
141 was assessed for each plate through the Z'-factor calculation. Compounds were considered toxic  
142 when the normalized value for all replicates was higher than the average +3 $\sigma$  (standard deviation,  
143 SD) of the DMSO negative control for the corresponding plate. Scores and score SD were then  
144 calculated for hit compounds by averaging normalized value for all replicates.

145

## 146 **Preparation of plates for Z'-factor and drug screening**

147 Ten nl of 10 mM PCL compounds, the nucleoside analogue DFT positive control (all dissolved in  
148 DMSO) and DMSO only as negative control were pre-spotted on imaging-compatible 384-well  
149 plates (Falcon plates, Corning Inc., New York, USA) using an Echo acoustic liquid handling  
150 system (Labcyte, San Jose, USA) by the EPFL-BSF, sealed and stored at -20°C. Each Z'-factor  
151 384-well plate consisted of 192 technical replicates of positive and negative controls, each. Each  
152 screening plate set consisted of four subset plates A to D. Each screening plate comprised 32  
153 technical replicates of positive and negative controls, each, and 320 PCL compounds.

154

## 155 **Wet-lab screening pipeline**

156 The screening was performed in four independent biological replicates 1 - 4. Liquid handling was  
157 performed using a Matrix WellMate dispenser and Matrix WellMate tubing cartridges (Thermo  
158 Fisher Scientific, Waltham, USA). Prior to usage, tubings were rinsed with 125 ml autoclaved  
159 double-distilled (dd) H<sub>2</sub>O followed by 125 ml autoclaved PBS. Pre-spotted compound plates were  
160 thawed at room temperature (RT) for 30 min, briefly centrifuged before compounds were  
161 dissolved in 10  $\mu$ l / well of PBS. 4,000 A549 cells / well in 60  $\mu$ l full medium were seeded onto the  
162 compounds using standard bore tubing cartridges. Following cell adhesion over night, the cells  
163 were inoculated with  $1.77 \times 10^5$  genome equivalents per well of HAdV-C2-dE3B-GFP in 10  $\mu$ l of full  
164 medium using bovine serum albumin (BSA, cell-culture grade, Sigma-Aldrich, St. Louis, USA)-  
165 blocked small bore tubing cartridges. The final compound concentration was 1.25  $\mu$ M at 0.0125%

166 DMSO. Infection was allowed to progress over multiple infection rounds for 72 h giving rise to foci  
167 of infected cells originating from a single first round infected cell. Cells were fixed for 1 h at RT by  
168 addition of 26.6  $\mu$ L 16% PFA and 4  $\mu$ g/ml Hoechst 33342 (Sigma-Aldrich, St. Louis, USA) in PBS  
169 using standard bore tubing cartridges. Cells were washed three times with PBS before PBS  
170 supplemented with 0.02%  $N_3$  was added and plates were sealed for long-term storage at 4°C.  
171 Following usage, tubings were rinsed with 125 ml autoclaved ddH<sub>2</sub>O followed by 125 ml  
172 autoclaved PBS and autoclaved for re-usage.

173

### 174 **Imaging**

175 Nuclei stained with Hoechst 33342 (DAPI channel) and viral GFP (FITC channel) were imaged  
176 on two devices. At UZH, plates were imaged on an IXM-C automated high-throughput  
177 fluorescence microscope (Molecular Devices, San Jose, USA) using MetaXpress (version 6.2,  
178 Molecular Devices, San Jose, USA) and a 4x air objective (Nikon S Fluor, 0.20 NA, 15.5 mm WD,  
179 Nikon Instruments, Minato, Japan) at widefield mode. Images of 2,048<sup>2</sup> px at 1.72  $\mu$ m/px  
180 resolution were acquired on an Andor sCMOS camera (Oxford Instruments, Abingdon, UK).  
181 Exposure times: DAPI 150 ms, FITC 20 ms. At EPFL, images were acquired on a IN Cell 2200  
182 automated high-throughput fluorescence microscope (GE Healthcare, Chicago, USA) using IN  
183 Cell Analyzer (version 6.2, GE Healthcare, Chicago, USA) and a 4x air objective (Nikon Plan Apo,  
184 0.20 NA, 15.7 mm WD, Nikon Instruments, Minato, Japan) at widefield mode. Image size  
185 2,048<sup>2</sup> px at 1.625  $\mu$ m/px resolution acquired on an Andor sCMOS camera. Exposure times: DAPI  
186 300 ms, FITC 40 ms.

187

### 188 **Image analysis**

189 The infection phenotype for each well was quantified by Plaque2.0<sup>33</sup>  
190 (<https://github.com/plaque2/matlab/tree/antivir>) via five main read-outs: number of nuclei, number  
191 of infected nuclei, the ratio between infected and total nuclei referred to as infection index, number  
192 of multi-round infection foci termed plaques (plaque forming unit(s), pfu) and the integrated viral  
193 transgenic GFP intensity. Plaque2.0 parameters were optimized independently at UZH and EPFL  
194 for the data acquired at the respective institution.

195

### 196 **Z'-factor calculation**

197 The Z'-factor was computed using R version 3.3.2<sup>35</sup> according to Equation (1)

$$198 \quad Z' = 1 - \frac{(3\sigma_+ + 3\sigma_-)}{|\mu_+ - \mu_-|} \quad (1)$$

199 where  $\sigma_+$  is the SD of the positive control,  $\sigma_-$  is the SD of the negative control,  $\mu_+$  the mean of the  
200 positive control and  $\mu_-$  the mean of the negative control.

201

### 202 **Screening data processing**

203 Plaque2.0 results were further processed and filtered. At UZH, results were processed in R  
204 version 3.3.2<sup>35</sup>, EPFL used KNIME version 3.4.0<sup>36</sup> as well as the EPFL-BSF in-house LIMS.  
205 Mean infection scores over the Plaque2.0 read-outs of the four biological replicates of each PCL  
206 compound and the 16 biological replicates containing each 32 technical replicates of positive and  
207 negative control, each, were calculated. Each compound's scores were normalized by the mean  
208 score of the DMSO negative control of the respective plate. Only non-toxic, effective PCL  
209 compounds were considered as HAdV inhibitor candidates. Non-toxic compounds were filtered

210 by applying an inclusive  $\mu_+$  (mean of the negative control)  $\pm 2\sigma$  (SD of the negative control)  
211 threshold for number of nuclei. Efficacy was filtered by applying an excluding  $\mu_+ \pm 3\sigma$  threshold  
212 for the infection scores (number of infected nuclei, infection index, number of plaques or  
213 integrated GFP intensity). Subsequently, compounds exhibiting significant toxicity to noninfected  
214 cells were excluded.

215  
216

## 217 **Data Records**

218

### 219 **Data structure and repository**

220 The screening data comprise the information collected during assay development, including  
221 stability, quality and screening of the PCL itself. The latter two were imaged on two different  
222 microscopes. We provide the parameters used for Plaque2.0 image analysis, and the code for  
223 the subsequent hit filtering in R. The data structure as available for download at the IDR <sup>1</sup>,  
224 accession number idr0081, outlined in Figure 2a. Moreover, the data can be viewed conveniently  
225 on the IDR web client, where it is structured as outlined in Figure 2b.

226

### 227 **Data sets and file types**

228 The data provided for download consists of three data sets 1 to 3 (see Figure 2a).

229 - *1-prePlates* contains layouts (.csv), images (.tif), Plaque2.0 image analysis parameters (.mat)  
230 and results (.csv) for the assay stability test plates performed at UZH prior to Z'-factor plates  
231 (*preZ*) and the screen (*preScreen*).

232 - *2-ZPlates* contains layouts (.csv), images (.tif), Plaque2.0 image analysis parameters (.mat) and  
233 results (.csv) for the two Z'-factor plates *a* and *b* as imaged and analysed at UZH (*Data\_UZH*)  
234 and EPFL (*Data\_EPFL*).

235 - *3-Screen* contains layouts (.csv), images (.tif), Plaque2.0 image analysis parameters (.mat) and  
236 results (.csv) for the 16 screening plates (four biological replicas *1 - 4*, each consisting of a set of  
237 four subset plates *A - D*) as imaged and analysed at UZH (*Data\_UZH*) and EPFL (*Data\_EPFL*).  
238 Moreover, *Analysis* contains the Plaque2.0 batch processing (*AntiVir\_batchprocessing.m*) and hit  
239 filtering pipeline (*AntiVir\_hitfiltering.R*) used by UZH. *Analysis* also contains the Presto-blue raw  
240 results (.csv) for toxicity in absence of infection.

241

242 The data provided for browsing via the IDR web client consists of five screens *A* to *E* (see Figure  
243 2b).

244 - *idr0081-study.txt* summarizes the overall study and the five screens that were performed.

245 - *screenA* contains the assay stability test plates performed at UZH prior to Z'-factor plates (*preZ*)  
246 and the screen (*preScreen*). *idr0081-screenA-library.txt* provides thorough information on the  
247 tested compounds including PubChem identifiers and their plate layout. *idr0081-screenA-*  
248 *processed.txt* presents the results of the Plaque2.0-based image analysis. *idr0081-screenA-*  
249 *mean.txt* summarises the infection scores per pre plate.

250 - *screenB* contains the assay quality test plates (Z'-factor plates *a* and *b*) performed at UZH.  
251 *idr0081-screenB-library.txt* provides thorough information on the tested compounds including  
252 PubChem identifiers and their plate layout. *idr0081-screenB-processed.txt* presents the results of

253 the Plaque2.0-based image analysis. *idr0081-screenB-mean.txt* summarises the infection scores  
254 per Z'-factor plate.

255 - *screenC* contains the assay quality test plates (Z'-factor plates *a* and *b*) performed at EPFL.  
256 *idr0081-screenC-library.txt* provides thorough information on the tested compounds including  
257 PubChem identifiers and their plate layout. *idr0081-screenC-processed.txt* presents the results of  
258 the Plaque2.0-based image analysis. *idr0081-screenC-mean.txt* summarises the infection scores  
259 per Z'-factor plate.

260 - *screenD* contains the PCL screening plates (in replicates *1* to *4*, consisting of subset plates *A* to  
261 *D*) performed at UZH. *idr0081-screenD-library.txt* provides thorough information on the tested  
262 compounds including PubChem identifiers and their plate layout. *idr0081-screenD-processed.txt*  
263 presents the results of the Plaque2.0-based image analysis. *idr0081-screenB-filtered.txt*  
264 summarises the infection scores per compound and indicates if it was identified as hit.

265 - *screenE* contains the PCL screening plates (in replicates *1* to *4*, consisting of subsets *A* to *D*)  
266 performed at EPFL. *idr0081-screenE-library.txt* provides thorough information on the tested com-  
267 pounds including PubChem identifiers and their plate layout. *idr0081-screenE-processed.txt*  
268 presents the results of the Plaque2.0-based image analysis. *idr0081-screenE-filtered.txt*  
269 summarises the infection scores per compound and indicates if it was identified as hit.

270

271

## 272 **Technical Validation**

273

### 274 **Assay stability**

275 The wet-lab screening pipeline was optimized regarding liquid handling, cell seeding, virus  
276 inoculum, positive and negative controls, infection time, as well as imaging and image analysis.  
277 This ensured a high assay stability and reproducibility. Furthermore, all compounds, especially  
278 media and supplements, the BSA for tubing saturation, PFA- and Hoechst-supplemented fixative  
279 were prepared as large batch from a single lot and stored as single-use aliquots. Prior to every  
280 experiment, assay stability with respect to cell and infection phenotype was tested on pre-plates  
281 according to the established wet-lab, imaging and image analysis pipeline. Since the solvent  
282 control had already been spotted in 10 µl PBS, no further PBS was added prior to cell seeding.  
283 Periodically, the virus stock dilution was tested and adjusted for experiments if necessary.

284

### 285 **Assay quality determination: Z'-factor**

286 The accuracy of the wet-lab, imaging and image analysis pipeline was assessed by two  
287 independently imaged and analyzed Z'-factor plates (Table 2 and Figure 3).  $3\sigma$  Z'-factors of  
288 *numberOfInfectedNuclei*, *infectionIndex* and *numberOfPlaques* were in the range of 0.30 to 0.57,  
289 scoring good to excellent. *totalVirusIntensity* (Z'-factors between -0.07 to 0.08) were not suitable  
290 to identify HAdV infection inhibitors, while *numberOfNuclei* (Z'-factors between -1.11 to -8.10)  
291 was not a useable readout either. Additionally, the Z'-factors were determined for each of the 16  
292 screening plates (Table 3 and Figure 4).  $3\sigma$  Z'-factors of *numberOfInfectedNuclei*, *infectionIndex*  
293 and *numberOfPlaques* were in the range of 0.27 to 0.57, scoring good to excellent.

294

### 295 **Independent analysis and filtering**

296 Imaging, image analysis and screening data processing were performed by two independent  
297 research teams at UZH and EPFL, as depicted in Figure 1. Raw and scored infection phenotypes

298 are shown for UZH and EPFL analyses (Supplementary Tables 2, 3 and Supplementary Tables  
299 4, 5, respectively). Both dry-lab pipelines confirmed the high assay quality (Tables 2 and 3).  
300 During hit filtering, PCL compounds that gave significant toxicity in uninfected cells were excluded  
301 during hit filtering (Figure 5, Table 4). As summarized in Figure 6 left panel, both scores are  
302 strongly correlated with  $R^2$  between 0.6870 - 0.9870. Both approaches yielded identical top scored  
303 compounds (Figure 6, right panel), of which Prestw-1764, Nelfinavir mesylate, was the top hit.

304  
305

## 306 Usage Notes

307

308 Five parameters were used to score the infection phenotype of each well: the number of nuclei  
309 (*numberOfNuclei*), number of infected nuclei (*numberOfInfectedNuclei*), the ratio between  
310 number of infected and total nuclei (*infectionIndex*), the number of multi-round infection foci  
311 termed plaques (*numberOfPlaques*) and the extend of viral GFP reporter expression as integrated  
312 GFP intensity (*totalVirusIntensity*).

313

### 314 Infection scoring using the Plaque2.0 GUI

315 A detailed manual for Plaque2.0 GUI-based infection phenotype scoring is available at  
316 [plaque2.github.io/](http://plaque2.github.io/). No MATLAB license is necessary.

317

318 The following settings should be used:

#### 319 Input/Output:

320 *Processing Folder:* Path to folder containing the images (e.g. *idr0081/3-*

321 *Screen/Data\_EPFL/Screen/BSF018292\_1A*).

322 *filename pattern Data\_UZH:* `.* (?<wellName>[A-Z][0-9]*)_(?<channelName>w[0-9]*).TIF`

323 *filename pattern Data\_EPFL:* `.* (?<wellName>[A-Z] - [0-9]+)[(fld 1 wv (?<channel>[A-Z]{4})].*.tif`

324 *Plate name:* Name of the plate to be analysed (e.g. *BSF018292\_1A*)

325 *Result Output Folder:* Path to the results folder in the respective data folder (e.g. *idr0081/3-*

326 *Screen/Data\_EPFL/Results*).

327 Stitch: Stitching of the images is not necessary, since every 384-well is imaged in a single site.

328 Do not activate the tab.

#### 329 Mask:

330 *Custom Mask File:* Path to the manually defined mask file (e.g. *idr0081/3-*

331 *Screen/Data\_UZH/Parameters*). Masking is optional and was not performed by EPFL.

#### 332 Monolayer:

333 *Channel:* Nuclei were imaged in channel 1.

#### 334 Plaque:

335 *Channel:* Viral GFP reporter signal was imaged in channel 2.

336

### 337 Infection scoring using the Plaque2.0 batch script

338 How to use the *AntiVir\_batchprocessing.m* for Plaque2.0 batch processing is indicated in the  
339 comments of the code.

340

341

## 342 Code Availability



343

344 **Plaque2.0 batch image analysis for infection scoring**

345 The MATLAB (version R2016b, The MathWorks, Natick, USA) script *AntiVir\_batchprocessing.m*  
346 used by UZH for image analysis is provided for download at IDR, accession number idr0081,  
347 under *idr0081/3-Screen/Analysis*. It is based on the Plaque2.0 software available on GitHub under  
348 GPLv3 open source license: <https://github.com/plaque2/matlab>.

349

350 To batch analyse the HAdV screening data by Plaque2.0, fork or download the Plaque2.0 AntiVir  
351 code from GitHub: <https://github.com/plaque2/matlab/tree/antivir>. Place the  
352 *AntiVir\_batchprocessing.m* file from *idr0081/3-Screen/Analysis* into the *Plaque2/matlab* folder  
353 and follow the instructions in *AntiVir\_batchprocessing.m*. A MATLAB license is required.

354

355 **Hit filtering using R**

356 The R<sup>35</sup> (version 3.6.1 (2019-07-05)) script *AntiVir\_hitfiltering.R* used by UZH for data processing  
357 and hit filtering is provided at IDR accession number idr0081 under *idr0081/3-Screen/Analysis*.

## 358 **Acknowledgements, Author Contributions & Competing Interests**

359

### 360 **Author Contributions**

361 UFG, VA, AY conceived the screening idea. FG designed the experiments, and with UFG  
362 coordinated the project. FK prepared the PCL-spotted plates. FG and RW performed the  
363 experiments. FG and FK acquired the data. FG and VA analysed the imaging data. LM and FG  
364 processed the data. GT organized and supervised the screening project at the EPFL-BSF. FG,  
365 FK and UFG wrote manuscript, with input from all the co-authors.

366

### 367 **Acknowledgements**

368 We thank the entire Greber lab for fruitful discussions and critical assessment of the data. We  
369 further thank the IDR team for making our work openly accessible.

370

### 371 **Competing Interests**

372 The authors declare no conflict of interest.

373

### 374 **Funding**

375 The work was supported by the Swiss National Science Foundation to UFG (Grant numbers  
376 316030\_170799 / 1 and 31003A\_179256 / 1), and the SNSF through the National Research  
377 Program “NCCR chemical biology” to GT and UFG.

378

### 379 **Abbreviations**

380 BSA, bovine serum albumin;  
381 BSF, Biomolecular Screening Facility;  
382 CMV, Cytomegalovirus;  
383 DFT, 3'-Deoxy-3'-fluorothymidine;  
384 DMEM, Dulbecco's Modified Eagle medium;  
385 DMSO, Dimethyl sulfoxide;  
386 dpi, days post infection;  
387 EPFL, Ecole Polytechnique Fédérale de Lausanne;  
388 FBS, fetal bovine serum;  
389 GFP, green fluorescent protein;  
390 HAdV, Human adenovirus;  
391 hpi, hours post infection;  
392 HTS, high-throughput screening;  
393 IDR, The Image Data Resource;  
394 LIMS, Laboratory Information Management System;  
395 LUT, Look up table;  
396 PCL, Prestwick Chemical Library;  
397 PFA, para-formaldehyde;  
398 pfu, plaque forming unit(s);  
399 RT, room temperature;  
400 SE, standard error;  
401 SD, standard deviation;  
402 UZH, University of Zurich

403 **Figures & Tables**  
a

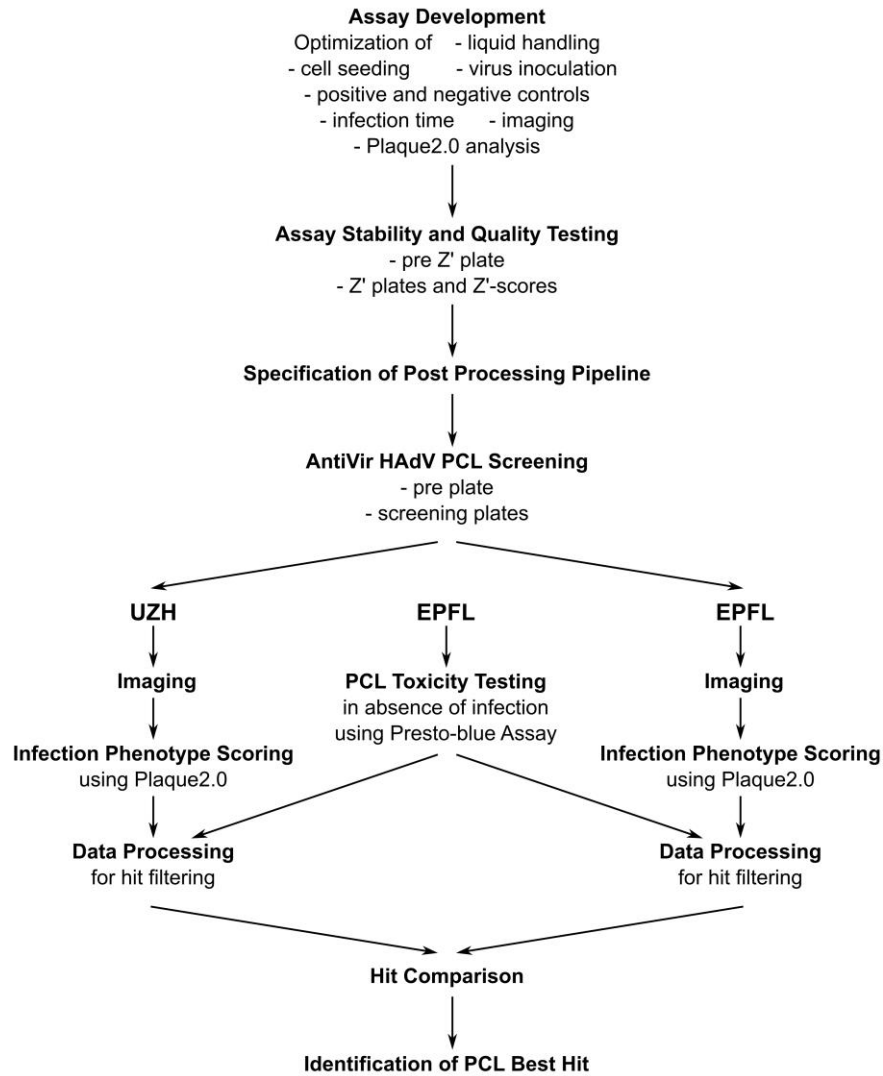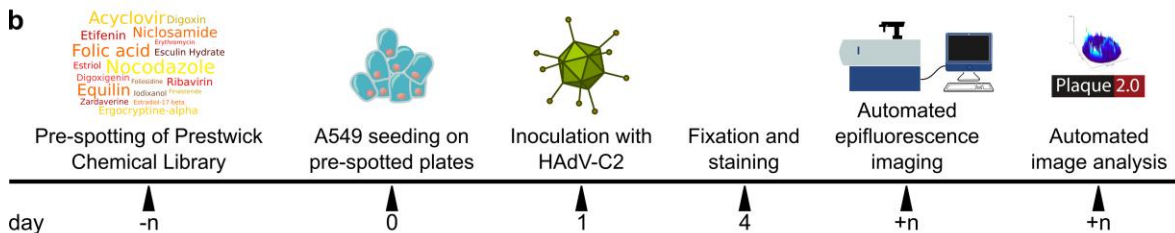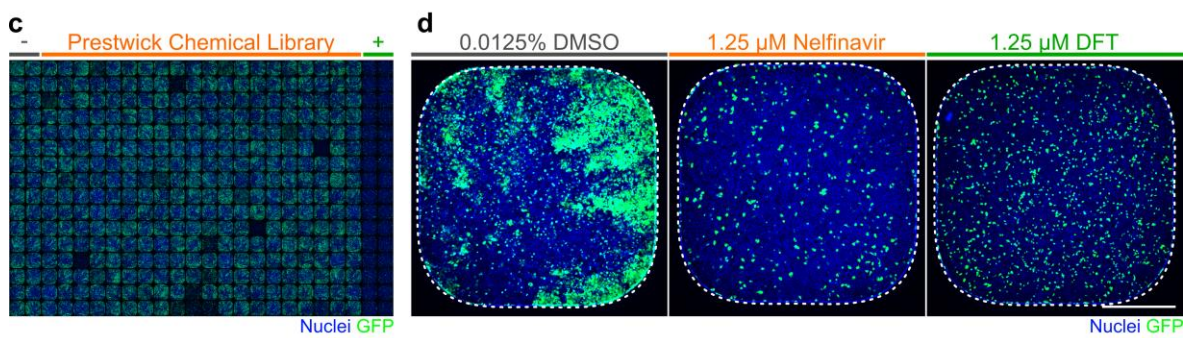

404

405 **Fig. 1: The compound screening procedure.**

406

407 **a** Following assay development, stability and quality testing, the screening of the PCL against HAdV  
408 infection was performed. Imaging, image analysis and data processing were independently carried out at  
409 UZH and EPFL, before hit ranking. **b** Schematic overview of the wet-lab pipeline. PCL compounds and DFT  
410 positive control in DMSO as well as DMSO alone as negative control were pre-spotted onto 384-well  
411 imaging plates by Echo acoustic liquid handling at 10 nl corresponding to a final concentration of 1.25  $\mu$ M  
412 in 80  $\mu$ l assay volume / well and stored at -20°C. Compound-blinded plates are thawed and 4,000 A549  
413 cells / wells seeded. The following day, the cells were inoculated with HAdV-C2-dE3B at  $1.77 \cdot 10^5$  genome  
414 equivalents / well. Allowing for multiple viral replication rounds, the cells were PFA-fixed at 72 hpi and the  
415 nuclei stained with Hoechst 33342. The infection phenotypes were imaged using an epifluorescence HT  
416 microscope and scored using Plaque2.0. The data of the four technical replicates were further processed  
417 in R or through EPFL-BSF LIMS. **c** Exemplary epifluorescence microscopy images of cells in 384-wells  
418 stitched to a screening plate overview of 32 replicates of negative (two most left columns) and positive  
419 control (two most right columns) and 320 blinded PCL compounds (centre 20 columns). Hoechst-stained  
420 nuclei are shown in blue, viral GFP in green. **d** Representative 384-well epifluorescence microscopy images  
421 of the DMSO negative control (most left), the DFT positive control (most right) and the top hit Nelfinavir  
422 mesylate (centre). Hoechst-stained nuclei are shown in blue, virally expressed GFP in green. Scale bar is  
423 5 mm.

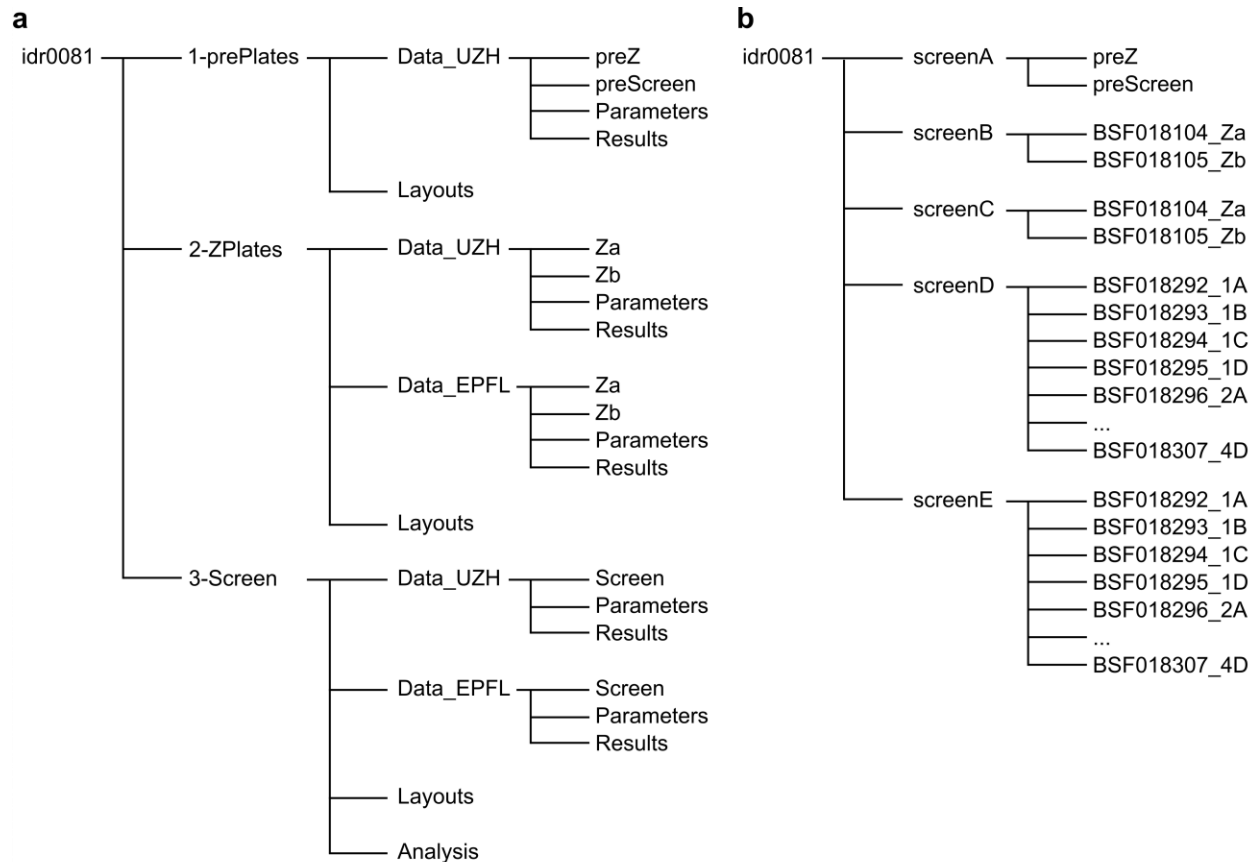

424  
425  
426  
427  
428  
429  
430  
431

**Fig. 2. Project data structure available at IDR, accession number IDR0081.**

**a** In the data provided for download, there are three sub-folders for *1-prePlates*, *2-ZPlates* and *3-Screen*. The latter two contain both the images and analyses generated by UZH and EPFL. **b** The data provided for viewing are divided into five screens: *screenA* contains the pre-plates and *screenB* and *screenC* consist of the Z'-factor plates imaged and analysed at UZH and EPFL, respectively. *screenD* and *screenE* provide the screening data obtained at UZH and EPFL, respectively.

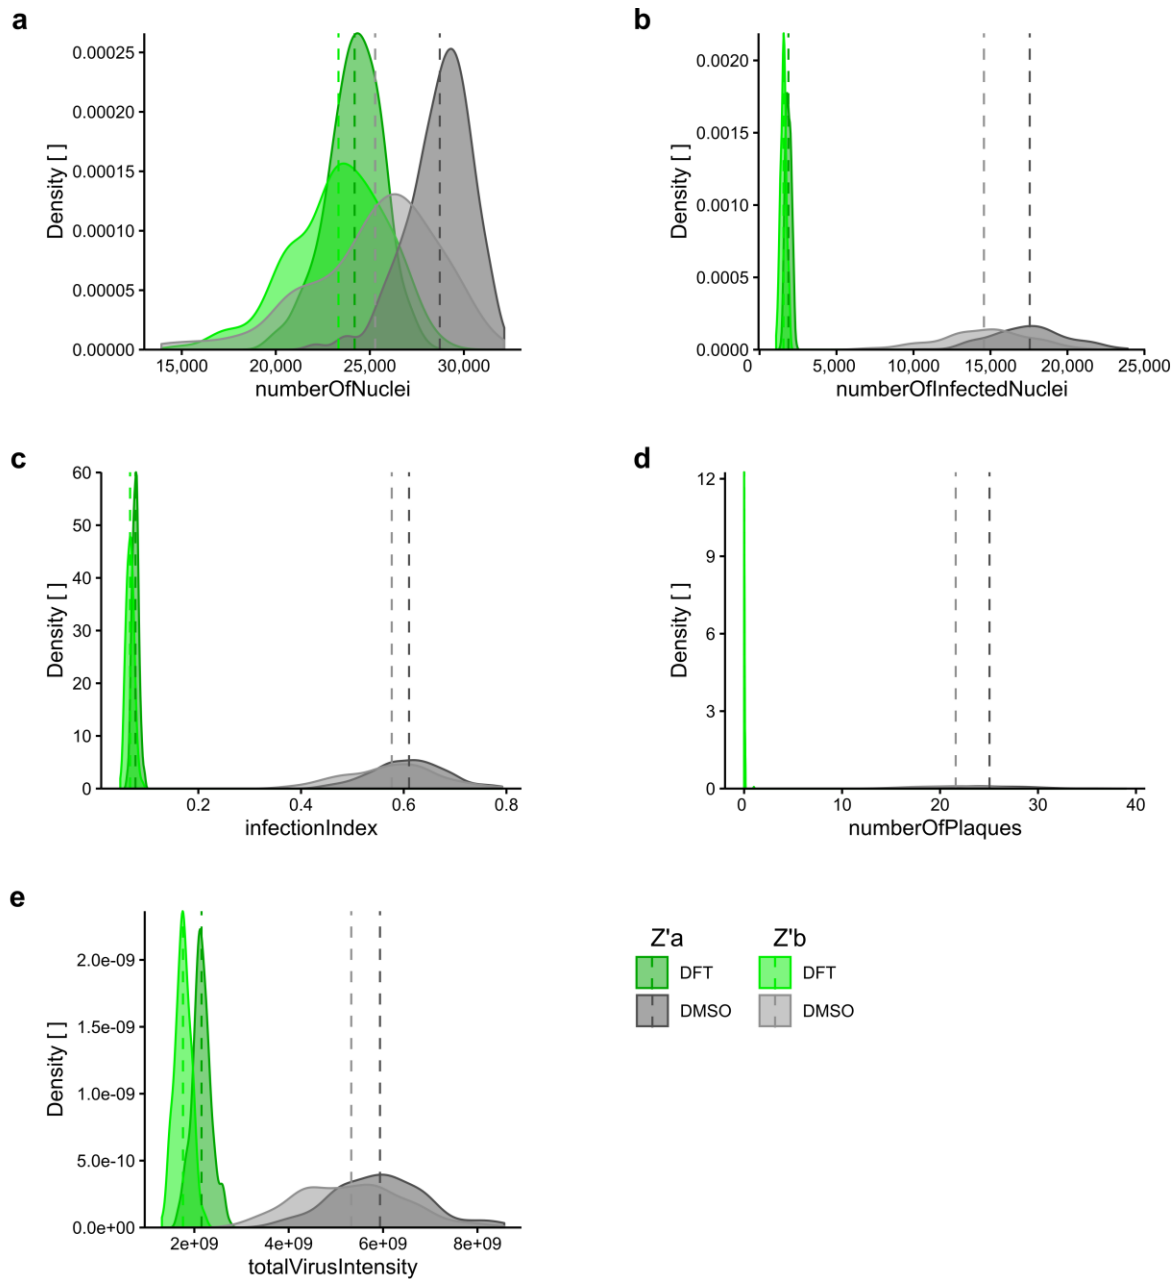

432  
433  
434

**Fig. 3: Infection score density of positive and negative controls across Z'-factor plates.**

435 Distribution of **a** *numberOfNuclei*, **b** *numberOfInfectedNuclei*, **c** *infectionIndex*, **d** *numberOfPlaques* and **e**  
436 *totalVirusIntensity* in negative control (0.0125% DMSO) compared to positive control-treated (1.25  $\mu$ M DFT)  
437 samples of the two Z'-factor plates. Dark green and dark grey indicate Z'-factor plate a, light green and grey  
438 show Z'-factor plate b. Dashed vertical lines mark mean of 192 technical replicates.

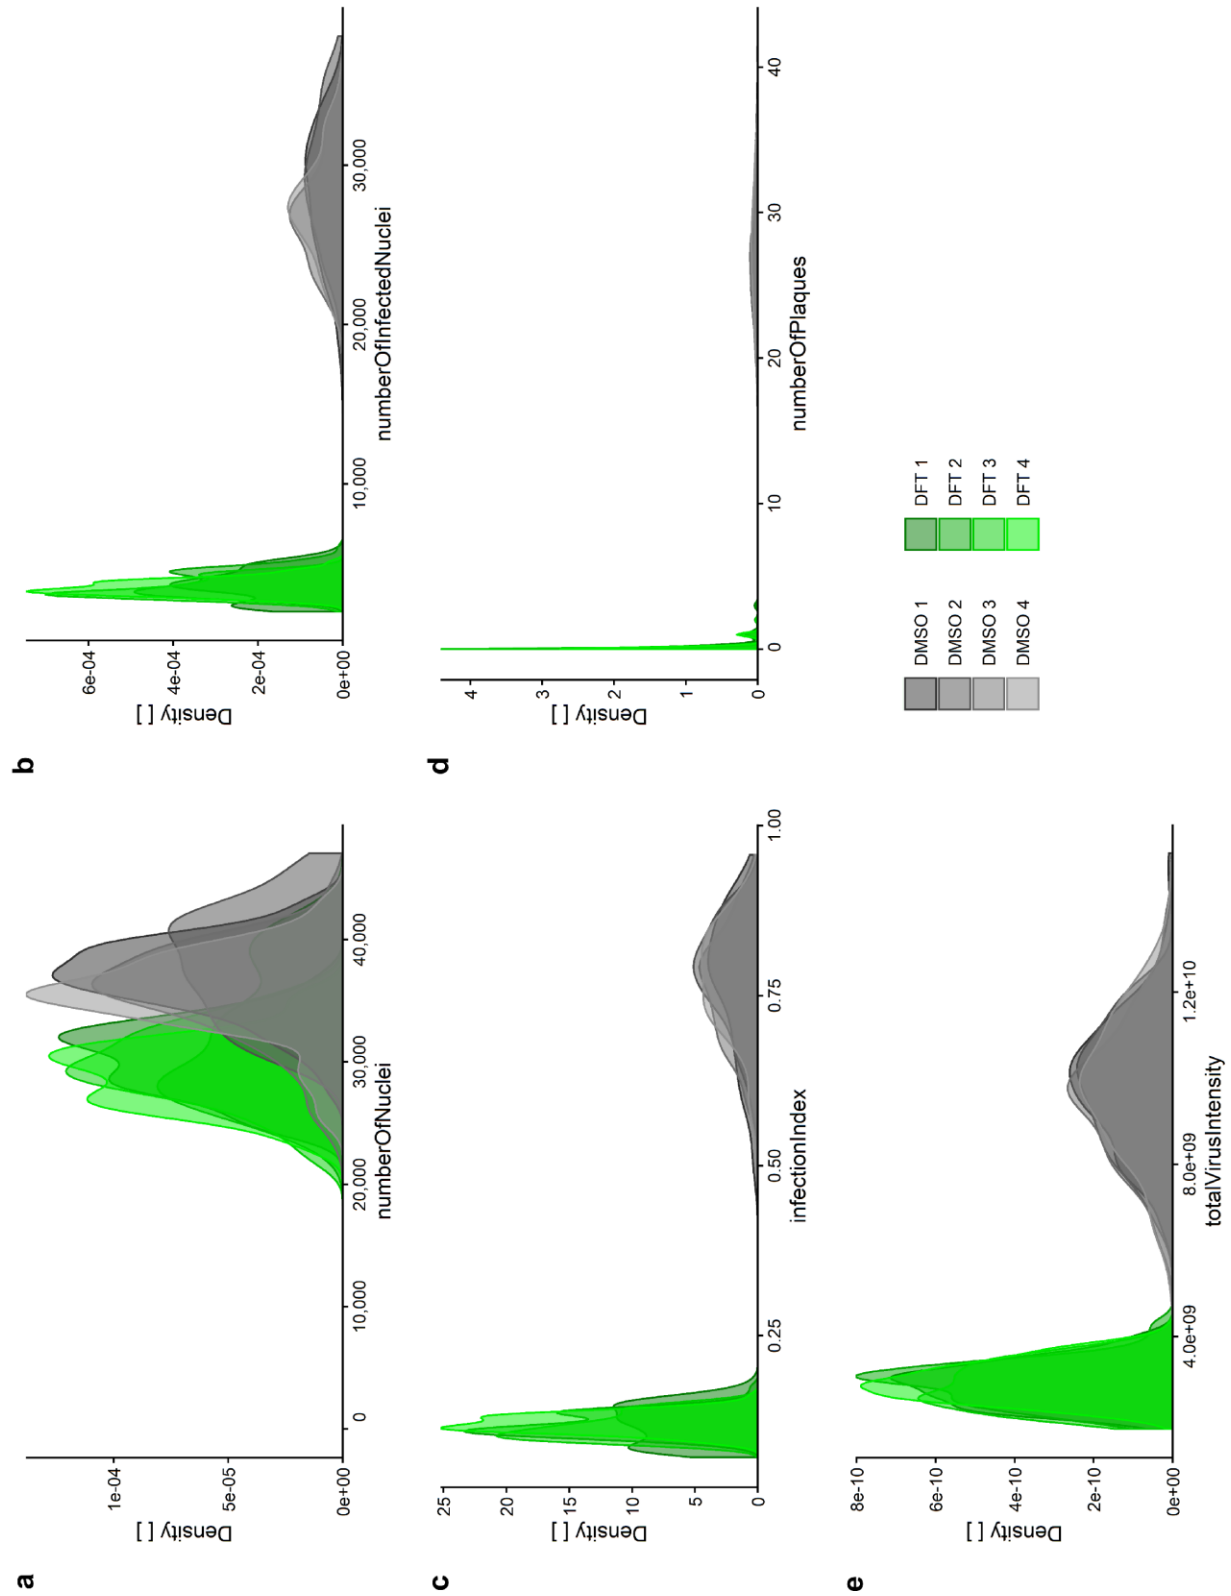

439  
440  
441  
442

**Fig. 4: Infection score density of positive and negative controls across screening replicates.**

443 Distribution of **a** *numberOfNuclei*, **b** *numberOfInfectedNuclei*, **c** *infectionIndex*, **d** *numberOfPlaques* and **e**  
444 *totalVirusIntensity* in negative control (0.0125% DMSO in grey) compared to positive control-treated  
445 (1.25  $\mu$ M DFT in green) samples of the screening sets. Each replicate 1 to 4 indicated by colour shading is  
446 comprised of four plates containing 32 technical replicas per control.



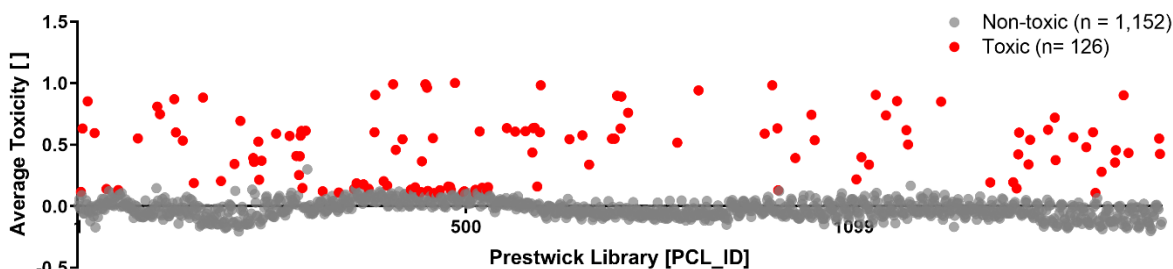

447  
448

**Fig. 5: PCL compound toxicity in uninfected cells.**

449

450 Of the 1,278 PCL compounds tested, 126 PCL compounds are found to be toxic, as shown in red, and  
451 listed in Table 4. A549 cells were treated with PCL compounds in duplicates according to the screening  
452 wet-lab protocol, however, in absence of HAdV infection for 3.5 days. Doxorubicin hydrochloride (Prestw-  
453 438) was used as a positive control for cytotoxicity, at a final concentration of 10  $\mu$ M, and the corresponding  
454 concentration of the drug solvent DMSO was used as a negative control. Cell viability was determined by  
455 Presto-blue assay. Presto-blue fluorescence intensities of each well were normalized per plate to negative  
456 control values at 0 and positive controls at 1. Compounds were considered toxic, when the normalized  
457 value for all replicates was higher than the average  $+3\sigma$  (standard deviation, SD) of the DMSO negative  
458 control for the corresponding plate. X-axis indicates compounds by their PCL identifier (*PCL ID*, see  
459 Supplementary Table 1). Normalized average presto-blue read-outs are depicted on the y-axis.

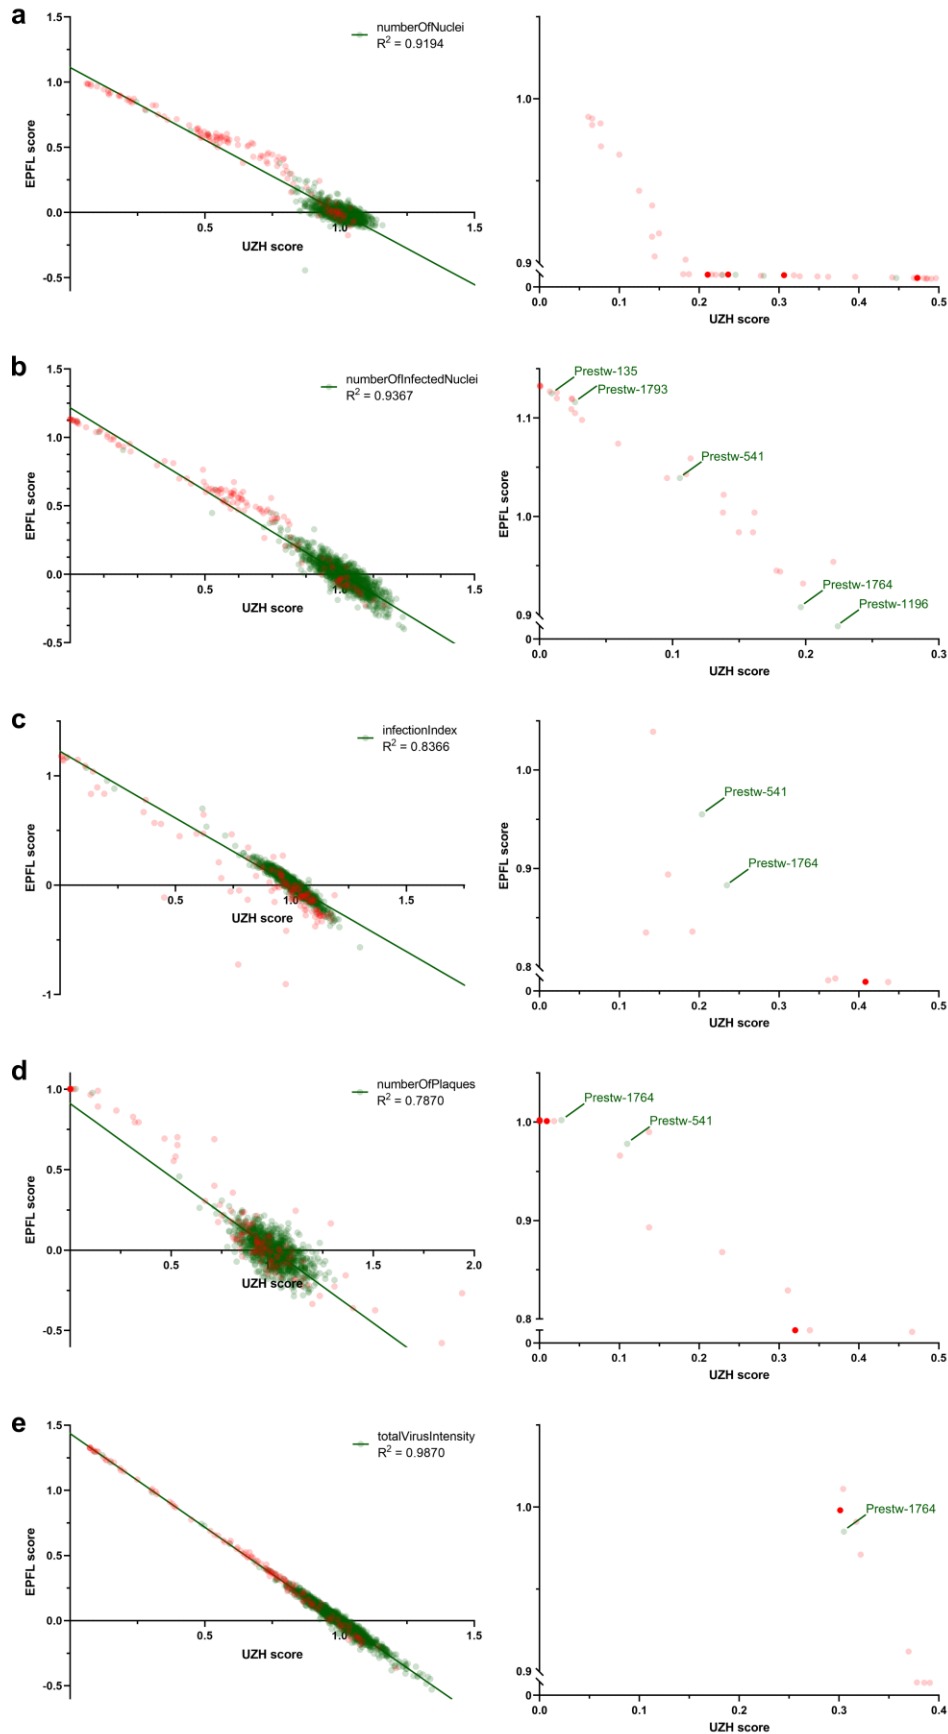

460

461 **Fig. 6: Correlation between scores from independent dry-lab pipelines.**

462

463 Imaging, image analysis and data processing is performed independently at UZH and EPFL. PCL-treated  
464 infection phenotypes from 4 biological replicates were averaged and normalized against the DMSO solvent  
465 control. Obtained scores for **a** *numberOfNuclei*, **b** *numberOfInfectedNuclei*, **c** *infectionIndex*, **d**  
466 *numberOfPlaques* and **e** *totalVirusIntensity* of the 1,278 tested PCL compounds from UZH and EPFL are  
467 correlated via linear regression (green line),  $R^2$  is calculated using GraphPad Prism 8.2.1. Highest scoring  
468 compounds are shown on the right and *PCL\_ID* of non-toxic compounds indicated. Red dots indicate  
469 toxicity in the absence of infection, non-toxic compounds are shown in green.

470 **Tab. 1: Summary of screening controls and top hits.**

471

472 Mean corresponds to the means over four biological replicates of PCL compound and 16 biological  
473 replicates each carrying 32 technical replicates for each control. Neg. ctr. refers to solvent control (DMSO),  
474 pos. ctr. to DFT-treated wells. Normalized indicates the mean read-outs of each compound relative to the  
475 mean of the positive control over all replicates. Toxicity was accessed by presto-blue assay of 3.5-day  
476 treatment of uninfected A549 cells as well as by the nuclei Z'-factor in the screen. Hits were selected for  
477 low toxicity and high inhibitory effects compared to solvent control samples. Note that compounds were  
478 scored toxic, if they showed significant toxicity in either of the assays.

479



481 **Tab. 2: Z'-factor plates.**

482

483 The quality of the screening platform was assessed prior to screening of the PCL by two independent Z'-  
 484 factor plates containing 192 technical replicates of both positive control (1.25  $\mu$ M DFT) and solvent only  
 485 control (0.0125% DMSO). Z'-factors for the five Plaque2.0 read-outs<sup>33</sup> obtained by independent analysis  
 486 at UZH and EPFL were calculated according to Equation (1) for 3 and 2 $\sigma$ .

487

488

|           |       | UZH             |                          |                 |                  |                      | EPFL            |                          |                 |                  |                      |
|-----------|-------|-----------------|--------------------------|-----------------|------------------|----------------------|-----------------|--------------------------|-----------------|------------------|----------------------|
|           |       | 3 sigma         |                          |                 |                  |                      | 3 sigma         |                          |                 |                  |                      |
| Barcode   | Plate | numberOf Nuclei | numberOf Infected Nuclei | infection Index | numberOf Plaques | totalVirus Intensity | numberOf Nuclei | numberOf Infected Nuclei | infection Index | numberOf Plaques | totalVirus Intensity |
| BSF018104 | Za    | -1.11           | 0.50                     | 0.57            | 0.50             | 0.07                 | -1.20           | 0.36                     | 0.47            | 0.52             | 0.08                 |
| BSF018105 | Zb    | -8.10           | 0.30                     | 0.45            | 0.39             | -0.07                | -1.23           | 0.27                     | 0.32            | 0.44             | -0.04                |
| Mean      |       | -4.61           | 0.40                     | 0.51            | 0.44             | 0.00                 | -1.22           | 0.32                     | 0.40            | 0.48             | 0.02                 |
|           |       | UZH             |                          |                 |                  |                      | EPFL            |                          |                 |                  |                      |
|           |       | 2 sigma         |                          |                 |                  |                      | 2 sigma         |                          |                 |                  |                      |
| Barcode   | Plate | numberOf Nuclei | numberOf Infected Nuclei | infection Index | numberOf Plaques | totalVirus Intensity | numberOf Nuclei | numberOf Infected Nuclei | infection Index | numberOf Plaques | totalVirus Intensity |
| BSF018104 | Za    | -0.41           | 0.67                     | 0.71            | 0.67             | 0.07                 | -0.47           | 0.58                     | 0.64            | 0.68             | 0.38                 |
| BSF018105 | Zb    | -5.07           | 0.53                     | 0.63            | 0.59             | -0.07                | -0.49           | 0.52                     | 0.55            | 0.63             | 0.31                 |
| Mean      |       | -2.74           | 0.60                     | 0.67            | 0.63             | 0.00                 | -0.48           | 0.55                     | 0.60            | 0.66             | 0.35                 |

489

490 **Tab. 3: Z'-factors of screening plates.**

491

492 The quality of the screening data was assessed for each screening plate based on the 32 technical  
 493 replicates of both positive control (1.25  $\mu$ M DFT) and solvent only control (0.0125% DMSO) in each plate.  
 494 Z'-factors for the five Plaque2.0 read-outs<sup>33</sup> obtained by independent analysis at UZH and EPFL were  
 495 calculated according to Equation (1) for  $3\sigma$ .  
 496  
 497

| Barcode   | Plate | UZH             |                          |                 |                  |                      | EPFL            |                          |                 |                  |                      |
|-----------|-------|-----------------|--------------------------|-----------------|------------------|----------------------|-----------------|--------------------------|-----------------|------------------|----------------------|
|           |       | numberOf Nuclei | numberOf Infected Nuclei | infection Index | numberOf Plaques | totalVirus Intensity | numberOf Nuclei | numberOf Infected Nuclei | infection Index | numberOf Plaques | totalVirus Intensity |
| BSF018292 | 1A    | -0.13           | 0.58                     | 0.58            | 0.59             | 0.35                 | -0.14           | 0.51                     | 0.49            | 0.58             | 0.31                 |
| BSF018293 | 1B    | -0.88           | 0.58                     | 0.65            | 0.55             | 0.34                 | -0.35           | 0.51                     | 0.52            | 0.51             | 0.35                 |
| BSF018294 | 1C    | -1.01           | 0.62                     | 0.62            | 0.63             | 0.33                 | -0.74           | 0.52                     | 0.50            | 0.66             | 0.32                 |
| BSF018295 | 1D    | -0.34           | 0.56                     | 0.54            | 0.45             | 0.16                 | -0.21           | 0.43                     | 0.38            | 0.46             | 0.19                 |
| BSF018296 | 2A    | -1.35           | 0.64                     | 0.67            | 0.55             | 0.30                 | -0.20           | 0.57                     | 0.55            | 0.55             | 0.28                 |
| BSF018297 | 2B    | -3.63           | 0.56                     | 0.52            | 0.45             | 0.14                 | -1.20           | 0.45                     | 0.39            | 0.40             | 0.12                 |
| BSF018298 | 2C    | -1.81           | 0.60                     | 0.58            | 0.49             | 0.24                 | -0.38           | 0.52                     | 0.42            | 0.52             | 0.19                 |
| BSF018299 | 2D    | -1.94           | 0.57                     | 0.57            | 0.57             | 0.24                 | -0.22           | 0.50                     | 0.43            | 0.63             | 0.20                 |
| BSF018300 | 3A    | -1.74           | 0.64                     | 0.66            | 0.56             | 0.36                 | -0.54           | 0.55                     | 0.51            | 0.59             | 0.34                 |
| BSF018301 | 3B    | -1.13           | 0.60                     | 0.68            | 0.58             | 0.40                 | -0.09           | 0.52                     | 0.57            | 0.59             | 0.40                 |
| BSF018302 | 3C    | -4.02           | 0.66                     | 0.68            | 0.48             | 0.42                 | -1.07           | 0.63                     | 0.60            | 0.50             | 0.41                 |
| BSF018303 | 3D    | -2.36           | 0.55                     | 0.63            | 0.51             | 0.36                 | -0.10           | 0.58                     | 0.54            | 0.52             | 0.35                 |
| BSF018304 | 4A    | -0.68           | 0.70                     | 0.74            | 0.42             | 0.37                 | -0.29           | 0.56                     | 0.58            | 0.48             | 0.36                 |
| BSF018305 | 4B    | -0.17           | 0.71                     | 0.74            | 0.51             | 0.50                 | -0.50           | 0.63                     | 0.67            | 0.50             | 0.50                 |
| BSF018306 | 4C    | -0.44           | 0.61                     | 0.62            | 0.50             | 0.28                 | -0.28           | 0.50                     | 0.48            | 0.47             | 0.26                 |
| BSF018307 | 4D    | -0.77           | 0.63                     | 0.70            | 0.42             | 0.41                 | -0.22           | 0.54                     | 0.56            | 0.36             | 0.39                 |
| Mean      |       | -1.40           | 0.61                     | 0.64            | 0.52             | 0.32                 | -0.41           | 0.53                     | 0.51            | 0.52             | 0.31                 |

498

499 **Tab. 4: PCL compounds excluded due to toxicity in uninfected cells.**

500

501 Presto-blue raw data are available at *idr0081/3-Screen/Analysis/Toxicity.xls*.

502

| PCL_ID      | Compound                             | Score | ScoreSD | Toxic | PCL_ID     | Compound                     | Score | ScoreSD | Toxic |
|-------------|--------------------------------------|-------|---------|-------|------------|------------------------------|-------|---------|-------|
| Prestw-100  | Nocodazole                           | 0.75  | 0.02    | yes   | Prestw-347 | Thioguanosine                | 0.18  | 0.03    | yes   |
| Prestw-1020 | Rimexolone                           | 0.39  | 0.08    | yes   | Prestw-353 | Moclobemide                  | 0.14  | 0.02    | yes   |
| Prestw-1040 | Pyriminium pamoate                   | 0.74  | 0.03    | yes   | Prestw-362 | Betamethasone                | 0.60  | 0.03    | yes   |
| Prestw-1044 | Prednicarbate                        | 0.54  | 0.00    | yes   | Prestw-363 | Colchicine                   | 0.91  | 0.00    | yes   |
| Prestw-1104 | Clonixin Lysinate                    | 0.22  | 0.05    | yes   | Prestw-373 | Amethopterin (R,S)           | 0.20  | 0.01    | yes   |
| Prestw-1110 | Parbendazole                         | 0.40  | 0.02    | yes   | Prestw-377 | Nafonyl oxalate              | 0.17  | 0.03    | yes   |
| Prestw-1119 | Clocortolone pivalate                | 0.34  | 0.04    | yes   | Prestw-385 | Mitoxantrone dihydrochloride | 0.99  | 0.00    | yes   |
| Prestw-1134 | Cytarabine                           | 0.91  | 0.00    | yes   | Prestw-388 | Dequalinium dichloride       | 0.46  | 0.00    | yes   |
| Prestw-1159 | Sibutramine HCl                      | 0.74  | 0.06    | yes   | Prestw-396 | Etoposide                    | 0.55  | 0.02    | yes   |
| Prestw-118  | Nalbuphine hydrochloride             | 0.87  | 0.00    | yes   | Prestw-4   | Metformin hydrochloride      | 0.12  | 0.00    | yes   |
| Prestw-1180 | Docetaxel                            | 0.86  | 0.03    | yes   | Prestw-409 | Amiodarone hydrochloride     | 0.14  | 0.02    | yes   |
| Prestw-1196 | Topotecan                            | 0.62  | 0.04    | yes   | Prestw-419 | Bisacodyl                    | 0.15  | 0.01    | yes   |
| Prestw-1198 | Tranilast                            | 0.50  | 0.02    | yes   | Prestw-430 | Cisapride                    | 0.12  | 0.02    | yes   |
| Prestw-12   | Benzonate                            | 0.85  | 0.06    | yes   | Prestw-432 | Corticosterone               | 0.37  | 0.01    | yes   |
| Prestw-120  | Triamcinolone                        | 0.60  | 0.03    | yes   | Prestw-436 | Digitoxigenin                | 0.99  | 0.00    | yes   |
| Prestw-1266 | Gemcitabine                          | 0.85  | 0.01    | yes   | Prestw-437 | Digoxin                      | 0.98  | 0.00    | yes   |
| Prestw-130  | Dexamethasone acetate                | 0.53  | 0.02    | yes   | Prestw-438 | Doxorubicin hydrochloride    | 0.96  | 0.00    | yes   |
| Prestw-1362 | Vorinostat                           | 0.19  | 0.01    | yes   | Prestw-439 | Carbimazole                  | 0.13  | 0.00    | yes   |
| Prestw-1408 | Etoricoxib                           | 0.20  | 0.03    | yes   | Prestw-447 | Hydrocortisone base          | 0.55  | 0.02    | yes   |
| Prestw-1415 | Flouxuridine                         | 0.15  | 0.04    | yes   | Prestw-448 | Hydroxytacrine maleate (R,S) | 0.11  | 0.00    | yes   |
| Prestw-1417 | Fluconazole                          | 0.42  | 0.01    | yes   | Prestw-456 | Meclocycline sulfosalicylate | 0.11  | 0.01    | yes   |
| Prestw-1419 | Fluocinolone acetonide               | 0.60  | 0.03    | yes   | Prestw-457 | Meclozine dihydrochloride    | 0.11  | 0.02    | yes   |
| Prestw-143  | Chlorhexidine                        | 0.19  | 0.02    | yes   | Prestw-458 | Melatonin                    | 0.13  | 0.01    | yes   |
| Prestw-1435 | Melengestrol acetate                 | 0.34  | 0.05    | yes   | Prestw-476 | Primaquine diphosphate       | 0.16  | 0.01    | yes   |
| Prestw-1443 | Misoprostol                          | 0.54  | 0.05    | yes   | Prestw-478 | Felodipine                   | 0.16  | 0.01    | yes   |
| Prestw-1476 | Amcinonide                           | 0.62  | 0.02    | yes   | Prestw-48  | Dicyclomine hydrochloride    | 0.13  | 0.03    | yes   |
| Prestw-1484 | Cladribine                           | 0.72  | 0.03    | yes   | Prestw-481 | Serotonin hydrochloride      | 0.13  | 0.01    | yes   |
| Prestw-1486 | Cortisol acetate                     | 0.38  | 0.08    | yes   | Prestw-487 | Daunorubicin hydrochloride   | 1.00  | 0.00    | yes   |
| Prestw-1509 | Deflazacort                          | 0.56  | 0.01    | yes   | Prestw-497 | Vancomycin hydrochloride     | 0.12  | 0.02    | yes   |
| Prestw-155  | Paclitaxel                           | 0.88  | 0.02    | yes   | Prestw-498 | Artemisinin                  | 0.12  | 0.00    | yes   |
| Prestw-1704 | Desonide                             | 0.48  | 0.06    | yes   | Prestw-513 | Norcyclobenzaprine           | 0.13  | 0.00    | yes   |
| Prestw-1712 | Flumethasone pivalate                | 0.60  | 0.02    | yes   | Prestw-514 | Pyrazinamide                 | 0.11  | 0.01    | yes   |
| Prestw-1715 | Algestone acetophenide               | 0.11  | 0.00    | yes   | Prestw-518 | Budesonide                   | 0.61  | 0.00    | yes   |
| Prestw-1722 | Azatadine maleate                    | 0.28  | 0.13    | yes   | Prestw-522 | Thiostrepton                 | 0.15  | 0.01    | yes   |
| Prestw-1740 | Besifloxacin hydrochloride           | 0.36  | 0.09    | yes   | Prestw-529 | Mesoridazine besylate        | 0.13  | 0.00    | yes   |
| Prestw-1741 | Loteprednol etabonate                | 0.46  | 0.05    | yes   | Prestw-6   | Trolox                       | 0.16  | 0.00    | yes   |
| Prestw-1752 | Epirubicin hydrochloride             | 0.90  | 0.02    | yes   | Prestw-553 | Pentamidine isethionate      | 0.64  | 0.01    | yes   |
| Prestw-176  | Iproniazide phosphate                | 0.21  | 0.11    | yes   | Prestw-572 | Mometasone furoate           | 0.61  | 0.00    | yes   |
| Prestw-1761 | Rizatriptan benzoate                 | 0.43  | 0.00    | yes   | Prestw-6   | Isoflupredone acetate        | 0.63  | 0.01    | yes   |
| Prestw-1801 | Ciclesonide                          | 0.55  | 0.03    | yes   | Prestw-619 | Diflorasone Diacetate        | 0.61  | 0.00    | yes   |
| Prestw-1802 | Darunavir                            | 0.43  | 0.06    | yes   | Prestw-641 | Sulmazole                    | 0.44  | 0.01    | yes   |
| Prestw-192  | Thalidomide                          | 0.34  | 0.09    | yes   | Prestw-643 | Flunisolide                  | 0.64  | 0.01    | yes   |
| Prestw-20   | Minoxidil                            | 0.60  | 0.01    | yes   | Prestw-645 | Flurandrenolide              | 0.64  | 0.01    | yes   |
| Prestw-200  | Camptothecine (S,+)                  | 0.69  | 0.02    | yes   | Prestw-652 | Picrotoxinin                 | 0.16  | 0.07    | yes   |
| Prestw-216  | Tiapride hydrochloride               | 0.39  | 0.02    | yes   | Prestw-655 | Halcinonide                  | 0.60  | 0.01    | yes   |
| Prestw-217  | Mebendazole                          | 0.36  | 0.02    | yes   | Prestw-656 | Lanatoside C                 | 0.98  | 0.00    | yes   |
| Prestw-222  | Antimycin A                          | 0.53  | 0.08    | yes   | Prestw-718 | Fluorometholone              | 0.55  | 0.03    | yes   |
| Prestw-223  | Xylometazoline hydrochloride         | 0.22  | 0.09    | yes   | Prestw-72  | Imipramine hydrochloride     | 0.55  | 0.00    | yes   |
| Prestw-226  | Griseofulvin                         | 0.37  | 0.07    | yes   | Prestw-734 | Flumethasone                 | 0.58  | 0.04    | yes   |
| Prestw-244  | Glutethimide, para-amino             | 0.59  | 0.00    | yes   | Prestw-743 | Medrysone                    | 0.34  | 0.01    | yes   |
| Prestw-260  | Praziquantel                         | 0.57  | 0.05    | yes   | Prestw-771 | Alclometasone dipropionate   | 0.55  | 0.02    | yes   |
| Prestw-268  | Vinpocetine                          | 0.41  | 0.01    | yes   | Prestw-774 | Fluocinonide                 | 0.55  | 0.03    | yes   |
| Prestw-271  | Vincamine                            | 0.25  | 0.00    | yes   | Prestw-777 | Alexidine dihydrochloride    | 0.90  | 0.00    | yes   |
| Prestw-272  | Indomethacin                         | 0.41  | 0.00    | yes   | Prestw-781 | Clobetasol propionate        | 0.63  | 0.00    | yes   |
| Prestw-273  | Cortisone                            | 0.57  | 0.01    | yes   | Prestw-782 | Podophyllotoxin              | 0.89  | 0.00    | yes   |
| Prestw-274  | Prednisolone                         | 0.61  | 0.00    | yes   | Prestw-790 | Cycloheximide                | 0.76  | 0.01    | yes   |
| Prestw-275  | Fenofibrate                          | 0.15  | 0.01    | yes   | Prestw-855 | Beclomethasone dipropionate  | 0.52  | 0.02    | yes   |
| Prestw-279  | Methylprednisolone, 6-alpha          | 0.61  | 0.00    | yes   | Prestw-883 | Digoxigenin                  | 0.94  | 0.00    | yes   |
| Prestw-299  | Mifepristone                         | 0.12  | 0.01    | yes   | Prestw-97  | Disulfiram                   | 0.81  | 0.04    | yes   |
| Prestw-318  | Quinacrine dihydrochloride dihydrate | 0.11  | 0.03    | yes   | Prestw-975 | Naftopidil dihydrochloride   | 0.59  | 0.01    | yes   |
| Prestw-337  | Procainamide hydrochloride           | 0.14  | 0.01    | yes   | Prestw-986 | Proscillaridin A             | 0.98  | 0.00    | yes   |
| Prestw-339  | Guanfacine hydrochloride             | 0.19  | 0.01    | yes   | Prestw-997 | Fluticasone propionate       | 0.63  | 0.02    | yes   |
| Prestw-34   | Triamterene                          | 0.14  | 0.00    | yes   | Prestw-998 | Zuclopenthixol hydrochloride | 0.13  | 0.01    | yes   |

503



504 **Supplementary Table 1: PCL compounds tested in the screening procedure.**

505  
506 PCL catalogue IDs (*PCL\_ID*), compound names (*CompoundName*), PubChem identifier  
507 (*CompoundPubChemCID*) and link (*CompoundPubChemURL*), the tested concentration in  $\mu\text{M}$   
508 (*CompoundConcentrationMicroMolar*), the CAS registry number (*CAS*), structure according SMILES  
509 notation (*CompoundSMILES*), acoustic dispensing spottability (*SpottabilityFlag*) and group (*Group*) for  
510 each of the 1,280 PCL compounds and control compounds. Two compounds, Prestw-354 (Clopamide) and  
511 Prestw-410 (Amphotericin B) could not be successfully transferred via acoustic dispensing due to  
512 precipitation, and were not included in the screening.

513  
514  
515 **Supplementary Table 2: Raw Plaque-2.0 infection scores of the HAdV PCL screening imaged and**  
516 **analysed at UZH.**

517  
518 *virus* indicates virus genotype, the PCL was tested against, *compoundIdentifier* indicates the UZH identifier  
519 for blinded testing by UZH, *setPlate* is the subset plate A to D and *replicate* refers to the replicate 1 to 4,  
520 *wellRow* and *wellColumn* indicate the well and *plate* indicate the screening plate sequence number. The  
521 Plaque2.0-based infection scores are *numberOfNuclei* reporting the number of nuclei based on Hoechst  
522 staining, *numberOfInfectedNuclei* refers to the number of GFP reporter-based number of infected nuclei,  
523 *infectionIndex* is the ratio of *numberOfInfectedNuclei* to *numberOfNuclei*, the number of GFP reporter-  
524 based plaques is given by *numberOfPlaques* and *totalVirusIntensity* indicates total GFP reporter signal  
525 intensity.

526  
527  
528 **Supplementary Table 3: Processed Plaque-2.0 infection scores of the HAdV PCL screening imaged**  
529 **and analysed at UZH.**

530  
531 *virus* indicates virus genotype, the PCL was tested against, *compoundIdentifier* indicates the UZH identifier  
532 for blinded testing by UZH, *PCL\_ID* and *compoundName* disclose the PCL compound identifier and name,  
533 respectively. *Barcode1*, *Barcode2*, *Barcode3* and *Barcode4* indicate on which screening plates, given by  
534 the screening plate sequence number defined by EPFL, the PCL compound was tested on. The Presto-  
535 blue toxicity scoring of the compound tested in noninfected cells is given as 1 (toxic) and 0 (non-toxic) in  
536 *nonInfectedToxHit*. The mean Plaque2.0-based infection scores of the four biological replicates are  
537 provided by *mean\_numberOfNuclei* (number of nuclei based on Hoechst staining),  
538 *mean\_numberOfInfectedNuclei* (number of GFP reporter-based number of infected nuclei),  
539 *mean\_infectionIndex* (ratio of *numberOfInfectedNuclei* to *numberOfNuclei*), *mean\_numberOfPlaques*  
540 (number of GFP reporter-based plaques) and *mean\_totalVirusIntensity* (total GFP reporter signal intensity).  
541 The infection scores of the positive and negative controls are averaged (mean) over the 32 technical  
542 replicates, each, per plate, and the mean PCL compound infection scores were normalized by the mean  
543 negative control infection score of the respective plate indicated by by *mean\_numberOfNucleiRel* (number  
544 of nuclei based on Hoechst staining), *mean\_numberOfInfectedNucleiRel* (number of GFP reporter-based  
545 number of infected nuclei), *mean\_infectionIndexRel* (ratio of *numberOfInfectedNuclei* to *numberOfNuclei*),  
546 *mean\_numberOfPlaquesRel* (number of GFP reporter-based plaques) and *mean\_totalVirusIntensityRel*  
547 (total GFP reporter signal intensity).

548  
549  
550 **Supplementary Table 4: Raw Plaque-2.0 infection scores of the HAdV PCL screening imaged and**  
551 **analysed at EPFL.**

552  
553 *Barcode* indicates the screening plate sequence number defined by EPFL and *Well Position* gives the well.  
554 Plaque2.0-based infection scores are *numberOfNuclei* reporting the number of nuclei based on Hoechst  
555 staining, *numberOfInfectedNuclei* refers to the number of GFP reporter-based number of infected nuclei,  
556 *infectionIndex* is the ratio of *numberOfInfectedNuclei* to *numberOfNuclei*, the GFP reporter-based number  
557 of plaques is given by *numberOfPlaques* and *totalVirusIntensity* indicates total GFP reporter signal intensity.

558  
559

560 **Supplementary Table 5: Processed Plaque-2.0 infection scores of the HA $\nu$  PCL screening**  
561 **imaged and analysed at EPFL.**

562  
563 *Name* indicates the name of the tested PCL compound. The Plaque2.0-based infection scores of the four  
564 biological replicates of each PCL compound were averaged (mean). The Plaque2.0-based infection scores  
565 of the positive and negative controls are averaged (mean) over the 32 technical replicates, each, per plate.  
566 Each compound's scores were normalized by the mean score of the negative control of the respective plate  
567 and indicated by *Mean N\_nuclei* (number of nuclei based on Hoechst staining), *Mean N\_infected* (number  
568 of GFP reporter-based number of infected nuclei), *Mean InfIndex* (ratio of *numberOfInfectedNuclei* to  
569 *numberOfNuclei*), *Mean N\_plaques* (number of GFP reporter-based plaques) and *Mean TotVirInt* (total  
570 GFP reporter signal intensity). Non-toxic compounds were filtered by applying an inclusive  $\mu +$  (mean of the  
571 negative control)  $\pm 2\sigma$  (SD of the negative control) threshold for number of nuclei. Efficacy was filtered by  
572 applying an excluding  $\mu + \pm 3\sigma$  (SD of the negative control) threshold for the infection scores. The obtained  
573 scores for each infection score of each PCL compound indicated as *Mean Scores N\_nuclei* (number of  
574 nuclei based on Hoechst staining), *Scores N\_Infected* (number of GFP reporter-based number of infected  
575 nuclei), *Scores InfIndex* (ratio of *numberOfInfectedNuclei* to *numberOfNuclei*), *Scores N\_plaques* (number  
576 of GFP reporter-based plaques) and *Scores TotVirInt* (total GFP reporter signal intensity). Subsequently,  
577 compounds exhibiting significant toxicity to noninfected cells were excluded.

## 578 References

- 579 1. The Image Data Resource (IDR). *The Image Data Resource (IDR)* at  
580 <<https://idr.openmicroscopy.org/>>
- 581 2. Krilov, L. R. Adenovirus infections in the immunocompromised host. *Pediatr. Infect. Dis. J.* **24**, 555–  
582 556 (2005).
- 583 3. Greber, U. F., Arnberg, N., Wadell, G., Benkő, M. & Kremer, E. J. Adenoviruses - from pathogens to  
584 therapeutics: a report on the 10th International Adenovirus Meeting. *Cell Microbiol.* **15**, 16–23  
585 (2013).
- 586 4. Tunkel, A. R., Baron, E. L., Buch, K. A., Marty, F. M. & Martinez-Lage, M. Case 31-2019: A 45-Year-  
587 Old Woman with Headache and Somnolence. *N. Engl. J. Med.* **381**, 1459–1470 (2019).
- 588 5. Gray, G. C. *et al.* Genotype prevalence and risk factors for severe clinical adenovirus infection,  
589 United States 2004-2006. *Clin. Infect. Dis.* **45**, 1120–1131 (2007).
- 590 6. Metzgar, D. *et al.* Abrupt emergence of diverse species B adenoviruses at US military recruit training  
591 centers. *J. Infect. Dis.* **196**, 1465–1473 (2007).
- 592 7. Lynch, J. P. & Kajon, A. E. Adenovirus: epidemiology, global spread of novel serotypes, and  
593 advances in treatment and prevention. *Semin Respir Crit Care Med* **37**, 586–602 (2016).
- 594 8. Haque, E., Banik, U., Monowar, T., Anthony, L. & Adhikary, A. K. Worldwide increased prevalence of  
595 human adenovirus type 3 (HAdV-3) respiratory infections is well correlated with heterogeneous  
596 hypervariable regions (HVRs) of hexon. *PLoS One* **13**, e0194516 (2018).
- 597 9. Jiang, H. *et al.* Oncolytic adenovirus research evolution: from cell-cycle checkpoints to immune  
598 checkpoints. *Curr Opin Virol* **13**, 33–39 (2015).
- 599 10. Lawler, S. E., Speranza, M.-C., Cho, C.-F. & Chiocca, E. A. Oncolytic viruses in cancer treatment: A  
600 review. *JAMA Oncol.* **3**, 841–849 (2017).
- 601 11. Ginn, S. L., Amaya, A. K., Alexander, I. E., Edelstein, M. & Abedi, M. R. Gene therapy clinical trials  
602 worldwide to 2017: An update. *J Gene Med* **20**, e3015 (2018).
- 603 12. Mennechet, F. J. D. *et al.* A review of 65 years of human adenovirus seroprevalence. *Expert Rev.*  
604 *Vaccines* **18**, 597–613 (2019).
- 605 13. Lion, T. Adenovirus persistence, reactivation, and clinical management. *FEBS Lett.* (2019).  
606 doi:10.1002/1873-3468.13576
- 607 14. Ismail, A. M. *et al.* Genomic foundations of evolution and ocular pathogenesis in human adenovirus  
608 species D. *FEBS Lett.* **593**, 3583–3608 (2019).
- 609 15. Harrach, B., Tarján, Z. L. & Benkő, M. Adenoviruses across the animal kingdom: a walk in the zoo.  
610 *FEBS Lett.* (2019). doi:10.1002/1873-3468.13687
- 611 16. Reddy, V. S., Natchiar, S. K., Stewart, P. L. & Nemerow, G. R. Crystal structure of human  
612 adenovirus at 3.5 Å resolution. *Science* **329**, 1071–1075 (2010).
- 613 17. Benevento, M. *et al.* Adenovirus composition, proteolysis, and disassembly studied by in-depth  
614 qualitative and quantitative proteomics. *J. Biol. Chem.* **289**, 11421–11430 (2014).
- 615 18. Greber, U. F. & Flatt, J. W. Adenovirus entry: from infection to immunity. *Annu. Rev. Virol.* **6**, 177–  
616 197 (2019).
- 617 19. Bauer, M. *et al.* The e3 ubiquitin ligase mind bomb 1 controls adenovirus genome release at the  
618 nuclear pore complex. *Cell Rep.* **29**, 3785–3795.e8 (2019).
- 619 20. Greber, U. F. Virus and host mechanics support membrane penetration and cell entry. *J. Virol.* **90**,  
620 3802–3805 (2016).
- 621 21. Wang, I.-H., Burckhardt, C. J., Yakimovich, A., Morf, M. K. & Greber, U. F. The nuclear export factor  
622 CRM1 controls juxta-nuclear microtubule-dependent virus transport. *J. Cell Sci.* **130**, 2185–2195  
623 (2017).
- 624 22. Prasad, V. *et al.* The UPR sensor IRE1 $\alpha$  and the adenovirus E3-19K glycoprotein sustain persistent  
625 and lytic infections. *Nat. Commun.* (2020).

- 626 23. King, C. R., Zhang, A., Tessier, T. M., Gameiro, S. F. & Mymryk, J. S. Hacking the cell: network  
627 intrusion and exploitation by adenovirus E1A. *MBio* **9**, (2018).
- 628 24. Zheng, Y., Stamminger, T. & Hearing, P. E2f/rb family proteins mediate interferon induced  
629 repression of adenovirus immediate early transcription to promote persistent viral infection. *PLoS*  
630 *Pathog.* **12**, e1005415 (2016).
- 631 25. Yakimovich, A. *et al.* Cell-free transmission of human adenovirus by passive mass transfer in cell  
632 culture simulated in a computer model. *J. Virol.* **86**, 10123–10137 (2012).
- 633 26. Tollefson, A. E. *et al.* The adenovirus death protein (E3-11.6K) is required at very late stages of  
634 infection for efficient cell lysis and release of adenovirus from infected cells. *J. Virol.* **70**, 2296–2306  
635 (1996).
- 636 27. Doronin, K. *et al.* Overexpression of the ADP (E3-11.6K) protein increases cell lysis and spread of  
637 adenovirus. *Virology* **305**, 378–387 (2003).
- 638 28. Lenaerts, L. & Naesens, L. Antiviral therapy for adenovirus infections. *Antiviral Res.* **71**, 172–180  
639 (2006).
- 640 29. Wold, W. S. M., Tollefson, A. E., Ying, B., Spencer, J. F. & Toth, K. Drug development against  
641 human adenoviruses and its advancement by Syrian hamster models. *FEMS Microbiol. Rev.* **43**,  
642 380–388 (2019).
- 643 30. Chauvin, C. *et al.* High-Throughput Drug Screening Identifies Pazopanib and Clofilium Tosylate as  
644 Promising Treatments for Malignant Rhabdoid Tumors. *Cell Rep.* **21**, 1737–1745 (2017).
- 645 31. Wall, G. *et al.* Screening a Repurposing Library for Inhibitors of Multidrug-Resistant *Candida auris*  
646 Identifies Ebselen as a Repositionable Candidate for Antifungal Drug Development. *Antimicrob.*  
647 *Agents Chemother.* **62**, (2018).
- 648 32. Prestwick Chemical publications. *Prestwick Chemical publications at*  
649 <http://www.prestwickchemical.com/libraries-publications.html>
- 650 33. Yakimovich, A. *et al.* Plaque2.0-A High-Throughput Analysis Framework to Score Virus-Cell  
651 Transmission and Clonal Cell Expansion. *PLoS One* **10**, e0138760 (2015).
- 652 34. Greber, U. F., Willetts, M., Webster, P. & Helenius, A. Stepwise dismantling of adenovirus 2 during  
653 entry into cells. *Cell* **75**, 477–486 (1993).
- 654 35. R Core Team. *R: A Language and Environment for Statistical Computing*. (R Foundation for  
655 Statistical Computing, 2018).
- 656 36. Berthold, M. R. *et al.* KNIME - the Konstanz information miner. *SIGKDD Explor. News.* **11**, 26  
657 (2009).
- 658
